# Supplementary material for: Remotely Piloted Aircraft System (RPAS)-Based Wildlife Detection: A Review and Case Studies in Maritime Antarctica
Source: Animals (Basel). 2020 Dec 14;10(12):2387. doi: 10.3390/ani10122387 (PMC7764989; doi:10.3390/ani10122387)
Supplement: Supplementary file 1 [file animals-10-02387-s001.xlsx]

## Sheet: Web of Science 157 articles
Publication Year	Authors	Author Full Names	Article Title	Source Title	Abstract	ISSN	eISSN	Volume	Issue	Start Page	End Page	Article Number	DOI
2020	Lamsters, K; Karuss, J; Krievans, M; Jeskins, J	Lamsters, Kristaps; Karuss, Janis; Krievans, Maris; Jeskins, Jurijs	High-resolution orthophoto map and digital surface models of the largest Argentine Islands (the Antarctic) from unmanned aerial vehicle photogrammetry	JOURNAL OF MAPS	This study presents the first high-resolution orthophoto maps and digital surface models (DSMs) of the largest Argentine Islands, West Antarctica. Aerial surveys with small unmanned aerial vehicle (UAV) were performed in Austral summer, 2018, taking 10,041 aerial photographs. Accuracy requirements were ensured using ground control points (GCPs). A resolution of 3.4 and 6.8 cm/px of orthomosaics a…	1744-5647		16	2	335	347		10.1080/17445647.2020.1748130
2020	Micheal, AA; Vani, K; Sanjeevi, S; Lin, CH	Micheal, A. Ancy; Vani, K.; Sanjeevi, S.; Lin, Chao-Hung	Object Detection and Tracking with UAV Data Using Deep Learning	JOURNAL OF THE INDIAN SOCIETY OF REMOTE SENSING	UAVs have been deployed in various object tracking applications such as disaster management, traffic monitoring, wildlife monitoring and crowd management. Recently, various deep learning methodologies have a profound effect on object detection and tracking. Deep learning-based object detectors rely on pre-trained networks. Problems arise when there is a mismatch between the pre-trained network do…	0255-660X	0974-3006						10.1007/s12524-020-01229-x
2020	Bushaw, JD; Ringelman, KM; Johnson, MK; Rohrer, T; Rohwer, FC	Bushaw, Jacob D.; Ringelman, Kevin M.; Johnson, Michael K.; Rohrer, Trenton; Rohwer, Frank C.	Applications of an unmanned aerial vehicle and thermal-imaging camera to study ducks nesting over water	JOURNAL OF FIELD ORNITHOLOGY	Finding and monitoring nests are key components of avian research, but they are often expensive, time-consuming, and inefficient operations. This is certainly true for diving ducks that nest in wetlands with thick emergent vegetation where nests are typically located by teams of technicians that wade through a marsh and beat vegetation with sticks, hoping to flush incubating females or encounter …	0273-8570	1557-9263						10.1111/jofo.12346
2020	Giles, AB; Butcher, PA; Colefax, AP; Pagendam, DE; Mayjor, M; Kelaher, BP	Giles, Anna B.; Butcher, Paul A.; Colefax, Andrew P.; Pagendam, Dan E.; Mayjor, Maddison; Kelaher, Brendan P.	Responses of bottlenose dolphins (Tursiopsspp.) to small drones	AQUATIC CONSERVATION-MARINE AND FRESHWATER ECOSYSTEMS	Recent advances in aerial drones offer new insights into the biology, ecology and behaviour of marine wildlife found on or near the ocean's surface. While opening up new opportunities for enhanced wildlife monitoring, the impacts of drone sampling and how it might influence interpretations of animal behaviour are only just beginning to be understood. The capacity of drones to record bottlenose do…	1052-7613	1099-0755						10.1002/aqc.3440
2020	Garcia, L; Parra, L; Jimenez, JM; Lloret, J; Mauri, PV; Lorenz, P	Garcia, Laura; Parra, Lorena; Jimenez, Jose M.; Lloret, Jaime; Mauri, Pedro V.; Lorenz, Pascal	DronAway: A Proposal on the Use of Remote Sensing Drones as Mobile Gateway for WSN in Precision Agriculture	APPLIED SCIENCES-BASEL	The increase in the world population has led to new needs for food. Precision Agriculture (PA) is one of the focuses of these policies to optimize the crops and facilitate crop management using technology. Drones have been gaining popularity in PA to perform remote sensing activities such as photo and video capture as well as other activities such as fertilization or scaring animals. These drones…		2076-3417	10	19			6668	10.3390/app10196668
2020	Thiel, C; Mueller, MM; Epple, L; Thau, C; Hese, S; Voltersen, M; Henkel, A	Thiel, Christian; Mueller, Marlin M.; Epple, Lea; Thau, Christian; Hese, Soren; Voltersen, Michael; Henkel, Andreas	UAS Imagery-Based Mapping of Coarse Wood Debris in a Natural Deciduous Forest in Central Germany (Hainich National Park)	REMOTE SENSING	Dead wood such as coarse dead wood debris (CWD) is an important component in natural forests since it increases the diversity of plants, fungi, and animals. It serves as habitat, provides nutrients and is conducive to forest regeneration, ecosystem stabilization and soil protection. In commercially operated forests, dead wood is often unwanted as it can act as an originator of calamities. Accordi…		2072-4292	12	20			3293	10.3390/rs12203293
2020	Edney, AJ; Wood, MJ	Edney, Alice J.; Wood, Matt J.	Applications of digital imaging and analysis in seabird monitoring and research	IBIS	Rapid advances in digital imaging technology offer efficient and cost-effective methods for measuring seabird abundance, breeding success, phenology, survival and diet. These methods can facilitate understanding of long-term population trends, and the design and implementation of successful conservation strategies. This paper reviews the suitability of satellites, manned aircraft, unmanned aerial…	0019-1019	1474-919X						10.1111/ibi.12871
2020	Fudala, K; Bialik, RJ	Fudala, Katarzyna; Bialik, Robert Jozef	Breeding Colony Dynamics of Southern Elephant Seals at Patelnia Point, King George Island, Antarctica	REMOTE SENSING	During the 2019 breeding season (October-December), a battery-powered DIJ Inspire 2 drone was used to investigate a breeding southern elephant seal colony located at Patelnia Point (ASPA 128, King George Island, South Shetland Islands, maritime Antarctica). Twelve unmanned aerial vehicle (UAV) missions conducted 50-70 m above ground level (AGL) were completed to monitor the breeding ground with a…		2072-4292	12	18			2964	10.3390/rs12182964
2020	Sun, Y; Yi, SH; Hou, FJ; Luo, DW; Hu, JQ; Zhou, ZY	Sun, Yi; Yi, Shuhua; Hou, Fujiang; Luo, Dongwen; Hu, Junqi; Zhou, Zhaoye	Quantifying the Dynamics of Livestock Distribution by Unmanned Aerial Vehicles (UAVs): A Case Study of Yak Grazing at the Household Scale	RANGELAND ECOLOGY & MANAGEMENT	Managed grazing is the most extensive land use worldwide. Information about the spatio-temporal distribution of livestock is critical for grassland ecosystem management. However, no direct and cost-effective method exists to monitor livestock distribution under natural conditions. We proposed a practical method that uses unmanned aerial vehicles (UAVs), and tested it at a typical household pastur…	1550-7424	1551-5028	73	5	642	648		10.1016/j.rama.2020.05.004
2020	Roberts, B; Neal, M; Snooke, N; Labrosse, F; Curteis, T; Fraser, M	Roberts, Benjamin; Neal, Mark; Snooke, Neal; Labrosse, Frederic; Curteis, Tristan; Fraser, Mariecia	A bespoke low-cost system for radio tracking animals using multi-rotor and fixed-wing unmanned aerial vehicles	METHODS IN ECOLOGY AND EVOLUTION	Due to the costs of related technologies, tracking studies typically use low numbers of animals as representative samples for whole group or species analysis, often without clear knowledge as to how representative these numbers are. The use of unmanned aerial vehicles (UAVs) has the potential to considerably improve radio-frequency (RF)-based tracking systems. This includes improved line-of-sight…	2041-210X	2041-2096	11	11	1427	1433		10.1111/2041-210X.13464
2020	Lachman, D; Conway, C; Vierling, K; Matthews, T	Lachman, Deo; Conway, Courtney; Vierling, Kerri; Matthews, Ty	Drones provide a better method to find nests and estimate nest survival for colonial waterbirds: a demonstration with Western Grebes	WETLANDS ECOLOGY AND MANAGEMENT	Drone use in wildlife biology has greatly increased as they become cheaper and easier to deploy in the field. In this paper we describe a less invasive method of using drones and exploring their limitations for studying colonial nesting waterbirds. Western Grebes, like most colonial nesting waterbirds, can be very sensitive to human interaction. Using a 3DR Solo quad copter equipped with a high-r…	0923-4861	1572-9834	28	5	837	845		10.1007/s11273-020-09743-y
2020	Scholten, BD; Beard, AR; Choi, H; Baker, DM; Caulfield, ME; Proppe, DS	Scholten, Bradley D.; Beard, Abigail R.; Choi, Hyeryeong; Baker, Dena M.; Caulfield, Margaret E.; Proppe, Darren S.	Short-term exposure to unmanned aerial vehicles does not alter stress responses in breeding tree swallows	CONSERVATION PHYSIOLOGY	Recent studies suggest that visual and acoustic anthropogenic disturbances can cause physiological stress in animals. Human-induced stress may be particularly problematic for birds as new technologies, such as drones, increasingly invade their low-altitude air space. Although professional and recreational drone usage is increasing rapidly, there is little information on how drones affect avian be…	2051-1434		8				coaa080	10.1093/conphys/coaa080
2020	Libran-Embid, F; Klaus, F; Tscharntke, T; Grass, I	Libran-Embid, Felipe; Klaus, Felix; Tscharntke, Teja; Grass, Ingo	Unmanned aerial vehicles for biodiversity-friendly agricultural landscapes-A systematic review	SCIENCE OF THE TOTAL ENVIRONMENT	The development of biodiversity-friendly agricultural landscapes is of major importance to meet the sustainable development challenges of our time. The emergence of unmanned aerial vehicles (UAVs), i.e. drones, has opened a new set of research and management opportunities to achieve this goal. On the one hand, this review summarizes UAV applications in agricultural landscapes, focusing on biodive…	0048-9697	1879-1026	732				139204	10.1016/j.scitotenv.2020.139204
2020	Prosekov, A; Kuznetsov, A; Rada, A; Ivanova, S	Prosekov, Alexander; Kuznetsov, Alexander; Rada, Artem; Ivanova, Svetlana	Methods for Monitoring Large Terrestrial Animals in the Wild	FORESTS	Reliable information about wildlife is absolutely important for making informed management decisions. The issues with the effectiveness of the control and monitoring of both large and small wild animals are relevant to assess and protect the world's biodiversity. Monitoring becomes part of the methods in wildlife ecology for observation, assessment, and forecasting of the human environment. World…		1999-4907	11	8			808	10.3390/f11080808
2020	DiMaggio, AM; Perotto-Baldivieso, HL; Ortega-S, JA; Walther, C; Labrador-Rodriguez, KN; Page, MT; Martinez, JD; Rideout-Hanzak, S; Hedquist, BC; Wester, DB	DiMaggio, Alexandria M.; Perotto-Baldivieso, Humberto L.; Ortega-S, J. Alfonso; Walther, Chase; Labrador-Rodriguez, Karelys N.; Page, Michael T.; Martinez, Jose de la Luz; Rideout-Hanzak, Sandra; Hedquist, Brent C.; Wester, David B.	A Pilot Study to Estimate Forage Mass from Unmanned Aerial Vehicles in a Semi-Arid Rangeland	REMOTE SENSING	The application of unmanned aerial vehicles (UAVs) in the monitoring and management of rangelands has exponentially increased in recent years due to the miniaturization of sensors, ability to capture imagery with high spatial resolution, lower altitude platforms, and the ease of flying UAVs in remote environments. The aim of this research was to develop a method to estimate forage mass in rangela…		2072-4292	12	15			2431	10.3390/rs12152431
2020	Beranek, CT; Roff, A; Denholm, B; Howell, LG; Witt, RR	Beranek, Chad T.; Roff, Adam; Denholm, Bob; Howell, Lachlan G.; Witt, Ryan R.	Trialling a real-time drone detection and validation protocol for the koala (Phascolarctos cinereus)	AUSTRALIAN MAMMALOGY	Remotely piloted aircraft system (RPAS), or drone, technology has emerged as a promising survey method for the cryptic koala. We demonstrate an in-field protocol for wild koala RPAS surveys which provides real-time validation of thermal signatures. During 15 trial flights using a quadcopter drone (DJI Matrice 200 v2) we successfully detected and validated koala thermal signatures (n = 12) using t…	0310-0049	1836-7402						10.1071/AM20043
2020	Vasconcellos, B; Trindade, J; Volk, L; Pinho, L	Vasconcellos, B.; Trindade, J.; Volk, L.; Pinho, L.	Method Applied To Animal MonitoringThrough VANT Images	IEEE LATIN AMERICA TRANSACTIONS	One of the necessary demands in extensive livestock systems is the counting of animals in areas of tens of hectares, costly when carried out manually and locally. In this context, this work proposes and discusses the efficacy of a semi-autonomous, non-invasive method for remote identification of animals in the field, applicable to precision livestock systems. The method was conceived from an expl…	1548-0992		18	7	1280	1287		10.1109/TLA.2020.9099770
2020	Sundaram, DM; Loganathan, A	Sundaram, Divya Meena; Loganathan, Agilandeeswari	FSSCaps-DetCountNet: fuzzy soft sets and CapsNet-based detection and counting network for monitoring animals from aerial images	JOURNAL OF APPLIED REMOTE SENSING	With the advances in remote sensing, wild animals sprawling over a vast area can be easily and quickly captured using low-cost unmanned aerial vehicle imagery. We propose an aerial animal detection and counting network (DetCountNet) framework called FSSCaps-DetCountNet, using fuzzy soft sets (FSS) and capsule network (CapsNet). Similarity measures based on FSS have been used to discriminate the t…	1931-3195		14	2			26521	10.1117/1.JRS.14.026521
2020	Ridge, JT; Johnston, DW	Ridge, Justin T.; Johnston, David W.	Unoccupied Aircraft Systems (UAS) for Marine Ecosystem Restoration	FRONTIERS IN MARINE SCIENCE	Assessing, implementing and monitoring ecosystem restoration can be a labor intensive process, often short term (<3 years), and potentially destructive to the habitat. Advances in remote sensing technology are generating rapid, non-destructive methods for siting, executing and monitoring restoration efforts, particularly in fragile marine environments. Unoccupied aircraft systems (UAS), or drones…		2296-7745	7				438	10.3389/fmars.2020.00438
2020	Bowler, E; Fretwell, PT; French, G; Mackiewicz, M	Bowler, Ellen; Fretwell, Peter T.; French, Geoffrey; Mackiewicz, Michal	Using Deep Learning to Count Albatrosses from Space: Assessing Results in Light of Ground Truth Uncertainty	REMOTE SENSING	Many wildlife species inhabit inaccessible environments, limiting researchers ability to conduct essential population surveys. Recently, very high resolution (sub-metre) satellite imagery has enabled remote monitoring of certain species directly from space; however, manual analysis of the imagery is time-consuming, expensive and subjective. State-of-the-art deep learning approaches can automate t…		2072-4292	12	12			2026	10.3390/rs12122026
2020	Curran, MF; Hodza, P; Cox, SE; Lanning, SG; Robertson, BL; Robinson, TJ; Stahl, PD	Curran, Michael F.; Hodza, Paddington; Cox, Samuel E.; Lanning, Shawn G.; Robertson, Blair L.; Robinson, Timothy J.; Stahl, Peter D.	Ground-level Unmanned Aerial System Imagery Coupled with Spatially Balanced Sampling and Route Optimization to Monitor Rangeland Vegetation	JOVE-JOURNAL OF VISUALIZED EXPERIMENTS	Rangeland ecosystems cover 3.6 billion hectares globally with 239 million hectares located in the United States. These ecosystems are critical for maintaining global ecosystem services. Monitoring vegetation in these ecosystems is required to assess rangeland health, to gauge habitat suitability for wildlife and domestic livestock, to combat invasive weeds, and to elucidate temporal environmental…	1940-087X			160			e61052	10.3791/61052
2020	Wied, JP; Perotto-Baldivieso, HL; Conkey, AAT; Brennan, LA; Mata, JM	Wied, Justin P.; Perotto-Baldivieso, Humberto L.; Conkey, April A. T.; Brennan, Leonard A.; Mata, Jose M.	Invasive grasses in South Texas rangelands: historical perspectives and future directions	INVASIVE PLANT SCIENCE AND MANAGEMENT	South Texas is home to a high diversity of species due to its location at the confluence of subtropical, desert, and coastal ecoregions. Historical overgrazing of South Texas rangelands transformed the savanna and prairie to a landscape dominated by woody plants and shrubs interspersed with low seral grass species and bare ground. During the first half of the 20th century, exotic grass species, c…	1939-7291	1939-747X	13	2	41	58	PII S1939729120000115	10.1017/inp.2020.11
2020	Bech-Hansen, M; Kallehauge, RM; Lauritzen, JMS; Sorensen, MH; Laubek, B; Jensen, LF; Pertoldi, C; Bruhn, D	Bech-Hansen, Mads; Kallehauge, Rune M.; Lauritzen, Jannik M. S.; Sorensen, Mathias H.; Laubek, Bjarke; Jensen, Lasse F.; Pertoldi, Cino; Bruhn, Dan	Evaluation of disturbance effect on geese caused by an approaching unmanned aerial vehicle	BIRD CONSERVATION INTERNATIONAL	Unmanned aerial vehicles (UAVs) are useful tools in ornithological studies. Importantly, though, UAV-caused disturbance has been noted to vary among species. This study evaluated guidelines for UAVs as a tool for researching geese. Twenty-four flocks of foraging geese were approached at an altitude of 50-100 m with a quadcopter UAV and disturbance effects were analysed across different horizontal…	0959-2709	1474-0001	30	2	169	175		10.1017/S0959270919000364
2020	Millner, N	Millner, Naomi	As the drone flies: Configuring a vertical politics of contestation within forest conservation	POLITICAL GEOGRAPHY	This paper explores how the use of new monitoring technologies, including drones, are being incorporated into forest conservation, with emphasis on what is at stake politically for forest-based communities. This is a critical area to consider, as the cheapness and easy availability of drones has fostered their rapid proliferation in conservation practices, for activities as diverse as wildlife co…	0962-6298	1873-5096	80				102163	10.1016/j.polgeo.2020.102163
2020	Jech, JM; Johnson, JJ; Lutcavage, ME; Vanderlaan, ASM; Rzhanov, Y; LeRoi, DJ	Jech, J. Michael; Johnson, Jennifer J.; Lutcavage, Molly E.; Vanderlaan, Angelia S. M.; Rzhanov, Yuri; LeRoi, Donald J.	Measurements of juvenile Atlantic bluefin tuna (Thunnus thynnus) size using an unmanned aerial system	JOURNAL OF UNMANNED VEHICLE SYSTEMS	An APH-22 vertical-takeoff-and-landing hexacopter was used to collect aerial images of schools and individuals of juvenile Atlantic bluefin tuna (ABET; Thunnus thynnus) at the sea surface in the southern Gulf of Maine. Quantitative measures of fish length, width, and inter-fish spacing were obtained from these images by applying calibration settings and performance measures from calibrating, test…	2291-3467		8	2	140	160		10.1139/juvs-2018-0039
2020	Kolarik, NE; Gaughan, AE; Stevens, FR; Pricope, NG; Woodward, K; Cassidy, L; Salerno, J; Hartter, J	Kolarik, Nicholas E.; Gaughan, Andrea E.; Stevens, Forrest R.; Pricope, Narcisa G.; Woodward, Kyle; Cassidy, Lin; Salerno, Jonathan; Hartter, Joel	A multi-plot assessment of vegetation structure using a micro-unmanned aerial system (UAS) in a semi-arid savanna environment	ISPRS JOURNAL OF PHOTOGRAMMETRY AND REMOTE SENSING	Unmanned Aerial Systems (UAS) represent an important niche platform for measuring vegetation health, structure, and productivity; metrics that directly inform sustainable conservation and development initiatives in rural African savannas. Products derived from UAS imagery have much finer spatial resolutions than traditional satellite or aircraft imagery, allowing the spectral and structural heter…	0924-2716	1872-8235	164		84	96		10.1016/j.isprsjprs.2020.04.011
2020	Christiansen, F; Nielsen, MLK; Charlton, C; Bejder, L; Madsen, PT	Christiansen, Fredrik; Nielsen, Mia L. K.; Charlton, Claire; Bejder, Lars; Madsen, Peter T.	Southern right whales show no behavioral response to low noise levels from a nearby unmanned aerial vehicle	MARINE MAMMAL SCIENCE	Unmanned aerial vehicles (UAVs) are increasingly used for wildlife research and monitoring, but little information exists on their potential effect on marine mammals. We assessed the effects of a UAV on the behavior of southern right whales (Eubalaena australis) in Australia. Focal follows of ten right whale mother-calf pairs were conducted using a theodolite. Control data were recorded for 30 mi…	0824-0469	1748-7692	36	3	953	963		10.1111/mms.12699
2020	Fish, A	Fish, Adam	Crash Theory: Entrapments of Conservation Drones and Endangered Megafauna	SCIENCE TECHNOLOGY & HUMAN VALUES	Drones deployed to monitor endangered species often crash. These crashes teach us that using drones for conservation is a contingent practice ensnaring humans, technologies, and animals. This article advances a crash theory in which pilots, conservation drones, and endangered megafauna are relata, or related actants, that intra-act, cocreating each other and a mutually constituted phenomena. Thes…	0162-2439	1552-8251					162243920920356	10.1177/0162243920920356
2020	Lei, GB; Li, AN; Zhang, ZJ; Bian, JH; Hu, GY; Wang, CB; Nan, X; Wang, JY; Tan, JB; Liao, XH	Lei, Guangbin; Li, Ainong; Zhang, Zhengjian; Bian, Jinhu; Hu, Guyue; Wang, Changbo; Nan, Xi; Wang, Jiyan; Tan, Jianbo; Liao, Xiaohan	The Quantitative Estimation of Grazing Intensity on the Zoige Plateau Based on the Space-Air-Ground Integrated Monitoring Technology	REMOTE SENSING	Grazing intensity (GI) is an important indicator for grazing situations in pastoral areas. However, it has been difficult to be observed directly in the field, due to the randomness and dynamics of the grazing behavior of livestock. Consequently, the lack of actual GI information has become a common issue in studies on quantitatively estimating GI. In this paper, a novel quantitative estimation m…		2072-4292	12	9			1399	10.3390/rs12091399
2020	Madurapperuma, B; Lamping, J; McDermott, M; Murphy, B; McFarland, J; Deyoung, K; Smith, C; MacAdam, S; Monroe, S; Corro, L; Magstadt, S; Dellysse, J; Mitchell, S	Madurapperuma, Buddhika; Lamping, James; McDermott, Michael; Murphy, Brian; McFarland, Jeremy; Deyoung, Kristy; Smith, Colleen; MacAdam, Sam; Monroe, Sierra; Corro, Lucila; Magstadt, Shayne; Dellysse, John; Mitchell, Solveig	Factors Influencing Movement of the Manila Dunes and Its Impact on Establishing Non-Native Species	REMOTE SENSING	Unmanned aerial vehicles (UAVs) are being widely used to monitor microtopographic and vegetation changes in coastal habitats using remote sensing techniques. Sand dune habitats are vital ecosystems along the North coast of Humboldt County in California. This study was conducted at the Manila Dunes, west of the Humboldt Coastal Nature Center, in Manila, California. Various factors influence dune m…		2072-4292	12	10			1536	10.3390/rs12101536
2020	Michez, A; Philippe, L; David, K; Sebastien, C; Christian, D; Bindelle, J	Michez, Adrien; Philippe, Lejeune; David, Knoden; Sebastien, Cremer; Christian, Decamps; Bindelle, Jerome	Can Low-Cost Unmanned Aerial Systems Describe the Forage Quality Heterogeneity? Insight from a Timothy Pasture Case Study in Southern Belgium	REMOTE SENSING	Applied to grazing management, unmanned aerial systems (UASs) allow for the monitoring of vegetation at the level of each individual on the pasture while covering a significant area (>10 ha per flight). Few studies have investigated the use of UASs to describe the forage quality in terms of nutritive value or chemical composition, while these parameters are essential in supporting the productive …		2072-4292	12	10			1650	10.3390/rs12101650
2020	Matzner, S; Warfel, T; Hull, R	Matzner, Shari; Warfel, Thomas; Hull, Ryan	ThermalTracker-3D: A thermal stereo vision system for quantifying bird and bat activity at offshore wind energy sites	ECOLOGICAL INFORMATICS	We present a new, efficient method for extracting three-dimensional animal motion trajectories from thermal stereo video data. Understanding animal behavior in the wild or other unconstrained environments is often based on animal movements. The technology described here is for understanding how bird and bat behavior is affected by the presence of wind turbines, specifically offshore wind turbines…	1574-9541	1878-0512	57				101069	10.1016/j.ecoinf.2020.101069
2020	Francis, RJ; Lyons, MB; Kingsford, RT; Brandis, KJ	Francis, Roxane J.; Lyons, Mitchell B.; Kingsford, Richard T.; Brandis, Kate J.	Counting Mixed Breeding Aggregations of Animal Species Using Drones: Lessons from Waterbirds on Semi-Automation	REMOTE SENSING	Using drones to count wildlife saves time and resources and allows access to difficult or dangerous areas. We collected drone imagery of breeding waterbirds at colonies in the Okavango Delta (Botswana) and Lowbidgee floodplain (Australia). We developed a semi-automated counting method, using machine learning, and compared effectiveness of freeware and payware in identifying and counting waterbird…		2072-4292	12	7			1185	10.3390/rs12071185
2020	Christiansen, F; Sprogis, KR; Gross, J; Castrillon, J; Warick, HA; Leunissen, E; Nash, SB	Christiansen, Fredrik; Sprogis, Kate R.; Gross, Jasmin; Castrillon, Juliana; Warick, Hunter A.; Leunissen, Eva; Nash, Susan Bengtson	Variation in outer blubber lipid concentration does not reflect morphological body condition in humpback whales	JOURNAL OF EXPERIMENTAL BIOLOGY	An animal's body condition provides valuable information for ecophysiological studies, and is an important measure of fitness in population monitoring and conservation. While both the external body shape of an animal and its internal tissues (i.e. fat content) can be used as a measure of body condition, the relationship between the two is not always linear. We compared the morphological body cond…	0022-0949	1477-9145	223	8			jeb213769	10.1242/jeb.213769
2020	Frouin-Mouy, H; Tenorio-Halle, L; Thode, A; Swartz, S; Urban, J	Frouin-Mouy, Heloise; Tenorio-Halle, Ludovic; Thode, Aaron; Swartz, Steven; Urban, Jorge	Using two drones to simultaneously monitor visual and acoustic behaviour of gray whales (Eschrichtius robustus) in Baja California, Mexico	JOURNAL OF EXPERIMENTAL MARINE BIOLOGY AND ECOLOGY	This study provides an initial demonstration of a combined two-UAV (Unmanned Aerial Vehicle) system for measuring the underwater source levels and behavioural context of vocal and non-vocal marine mammal signals, information that is highly ecologically-relevant in terms of understanding how a species interacts and copes with conspecifics and its acoustic environment. Although the calls of a few s…	0022-0981	1879-1697	525				151321	10.1016/j.jembe.2020.151321
2020	Llerena, FI; Barranco, AF; Bogeat, JA; Segura, F; Andujar, JM	Isorna Llerena, Fernando; Fernandez Barranco, Alvaro; Antonio Bogeat, Jose; Segura, Francisca; Manuel Andujar, Jose	Converting a Fixed-Wing Internal Combustion Engine RPAS into an Electric Lithium-Ion Battery-Driven RPAS	APPLIED SCIENCES-BASEL	Featured Application The main application was to give a second life to an obsolete and declassified type of RPAS (remotely piloted aircraft system) for use in monitoring key parameters, in the cultivation of the olive tree and in other types of cultivation that occupy large areas of land. Similarly, it can be used to track and monitor endangered animal species. INTA (National Institute for Aerosp…		2076-3417	10	5			1573	10.3390/app10051573
2020	Williams, PJ; Schroeder, C; Jackson, P	Williams, Perry J.; Schroeder, Cody; Jackson, Pat	Estimating Reproduction and Survival of Unmarked Juveniles Using Aerial Images and Marked Adults	JOURNAL OF AGRICULTURAL BIOLOGICAL AND ENVIRONMENTAL STATISTICS	Methods for estimating juvenile survival of wildlife populations often rely on intensive data collection efforts to capture and uniquely mark individual juveniles and observe them through time. Capturing juveniles in a time frame sufficient to estimate survival can be challenging due to narrow and stochastic windows of opportunity. For many animals, juvenile survival depends on postnatal parental…	1085-7117	1537-2693	25	2	133	147		10.1007/s13253-020-00384-5
2020	Martins, WBR; Lima, MDR; Barros , UD; Amorim, LSVB; Oliveira, FD; Schwartz, G	Rocha Martins, Walmer Bruno; Roque Lima, Michael Douglas; Barros Junior, Udson de Oliveira; Villas-Boas Amorim, Larissa Sousa; Oliveira, Francisco de Assis; Schwartz, Gustavo	Ecological methods and indicators for recovering and monitoring ecosystems after mining: A global literature review	ECOLOGICAL ENGINEERING	Mining contributes significantly to the world's economy. However, it brings strong environmental impacts, including the destruction of the original vegetation. In this way, the recovery of degraded areas by mining has been a mandatory procedure in many countries. With the objective to review this subject, a bibliometric analysis was carried out using scientific articles published in the period 19…	0925-8574	1872-6992	145				105707	10.1016/j.ecoleng.2019.105707
2020	Hodgson, JC; Holman, D; Terauds, A; Koh, LP; Goldsworthy, SD	Hodgson, Jarrod C.; Holman, Dirk; Terauds, Aleks; Koh, Lian Pin; Goldsworthy, Simon D.	Rapid condition monitoring of an endangered marine vertebrate using precise, non-invasive morphometrics	BIOLOGICAL CONSERVATION	Understanding causes of population change is critical for conservation. Quantifying these causes can be difficult, especially for hard to sample animals like marine vertebrates (e.g. pinnipeds). One solution is to investigate spatiotemporal differences in a species' body condition by measuring body size and mass. Collecting traditional morphological measurements is risky and labour intensive, mak…	0006-3207	1873-2917	242				108402	10.1016/j.biocon.2019.108402
2020	Oosthuizen, WC; Kr?ger, L; Jouanneau, W; Lowther, AD	Oosthuizen, W. Chris; Kruger, Lucas; Jouanneau, William; Lowther, Andrew D.	Unmanned aerial vehicle (UAV) survey of the Antarctic shag (Leucocarbo bransfieldensis) breeding colony at Harmony Point, Nelson Island, South Shetland Islands	POLAR BIOLOGY	Monitored seabird populations-useful sentinels of marine ecosystem health-have been declining worldwide at a rapid pace. Yet, lack of reliable long-term monitoring data constrains assessment of the conservation status of many seabird populations. Unmanned aerial vehicles (UAVs) have the potential to increase survey efficiency and count precision of seabird populations, especially where time const…	0722-4060	1432-2056	43	2	187	191		10.1007/s00300-019-02616-y
2020	Linol, B; Miller, W; Rensburg, C; Schoeman, R; Bezuidenhout, L; Genin, F; Morkel, B; Dhliwayo, N; Jeppesen, K; Dlakavu, S; Poto, O; Mahed, G; Gariremo, N; Berkland, J; Claassen, D; Sebake, T; Kunjwa, T; Guzzo, G; Bobbio, M; Pellen, R; Mngcele, L; Makuzeni, M; Winkler, K; Tembe, T; Musa, S; Valashiya, K; Nengovhela, V; Sonn, V; Stroebel, D; Kom, N; Mambalu, P; Dhansay, T; Muedi, T; Ntholi, T	Linol, Bastien; Miller, Warren; Rensburg, Cheryl; Schoeman, Renee; Bezuidenhout, Lucian; Genin, Fabien; Morkel, Barry; Dhliwayo, Nyaradzo; Jeppesen, Keegan; Dlakavu, Sinazo; Poto, Okuhle; Mahed, Gaathier; Gariremo, Natasha; Berkland, James; Claassen, Debbie; Sebake, Tebogo; Kunjwa, Thulisile; Guzzo, Gregorio; Bobbio, Maria; Pellen, Romain; Mngcele, Lizalise; Makuzeni, Manyano; Winkler, Katherine;…	Earth Stewardship Science-Transdisciplinary Contributions to Quantifying Natural and Cultural Heritage of Southernmost Africa	REMOTE SENSING	Evaluating anthropogenic changes to natural systems demand greater quantification through innovative transdisciplinary research focused on adaptation and mitigation across a wide range of thematic sciences. Southernmost Africa is a unique field laboratory to conduct such research linked to earth stewardship, with 'earth' as in our Commons. One main focus of the AEON's Earth Stewardship Science Re…		2072-4292	12	3			420	10.3390/rs12030420
2020	Fust, P; Loos, J	Fust, Pascal; Loos, Jacqueline	Development perspectives for the application of autonomous, unmanned aerial systems (UASs) in wildlife conservation	BIOLOGICAL CONSERVATION	Conservation management requires reliable and up-to-date data on land use, wildlife population sizes and resource distribution across highly variable ecosystems. Simultaneously, limited funding in conservation often restrict the assessment and interpretation of these datasets. Unmanned aerial systems (UASs) appear as promising and cost-efficient tools to deliver high-quality data, especially when…	0006-3207	1873-2917	241				108380	10.1016/j.biocon.2019.108380
2020	Vera-Amaro, R; Rivero-Angeles, ME; Luviano-Juarez, A	Vera-Amaro, Rodolfo; Eduardo Rivero-Angeles, Mario; Luviano-Juarez, Alberto	Data Collection Schemes for Animal Monitoring Using WSNs-Assisted by UAVs: WSNs-Oriented or UAV-Oriented	SENSORS	Wireless sensor networks (WSNs) and unmanned aerial vehicles (UAVs) have been used for monitoring animals but when their habitats have difficult access and are areas of a large expanse, remote monitoring by classic techniques becomes a difficult task. The use of traditional WSNs requires a restrictive number of hops in a multi-hoping routing scheme, traveling long distances to the sink node where…		1424-8220	20	1			262	10.3390/s20010262
2019	Zimudzi, E; Sanders, I; Rollings, N; Omlin, C	Zimudzi, Edward; Sanders, Ian; Rollings, Nicholas; Omlin, Christian	Segmenting mangrove ecosystems drone images using SLIC superpixels	GEOCARTO INTERNATIONAL	Mangrove ecosystems play a very important ecological role on land?ocean interfaces in tropical regions. These ecosystems comprise of various tree species and aquatic animals, protecting the environment and providing a habitat that supports many living organisms including humans. The identification of image regions in mangrove ecosystems plays a significant role in ecosystem monitoring and conserv…	1010-6049	1752-0762	34	14	1648	1662		10.1080/10106049.2018.1497093
2019	Barbedo, JGA; Koenigkan, LV; Santos, TT; Santos, PM	Arnal Barbedo, Jayme Garcia; Koenigkan, Luciano Vieira; Santos, Thiago Teixeira; Santos, Patricia Menezes	A Study on the Detection of Cattle in UAV Images Using Deep Learning	SENSORS	Unmanned aerial vehicles (UAVs) are being increasingly viewed as valuable tools to aid the management of farms. This kind of technology can be particularly useful in the context of extensive cattle farming, as production areas tend to be expansive and animals tend to be more loosely monitored. With the advent of deep learning, and convolutional neural networks (CNNs) in particular, extracting rel…		1424-8220	19	24			5436	10.3390/s19245436
2019	Blight, LK; Bertram, DF; Kroc, E	Blight, Louise K.; Bertram, Douglas F.; Kroc, Edward	Evaluating UAV-based techniques to census an urban-nesting gull population on Canada's Pacific coast	JOURNAL OF UNMANNED VEHICLE SYSTEMS	The use of unmanned aerial vehicles, or drones, in wildlife monitoring has increased in recent years, particularly in hard-to-access habitats. We used fixed-wing and quadcopter drones to census an urban-nesting population of Glaucous-winged Gulls in Victoria, Canada. We conducted our study over 2 years and asked whether (i) drones represent a suitable survey method for rooftop-nesting gulls in ou…	2291-3467		7	4	312	324		10.1139/juvs-2019-0005
2019	Boukoberine, MN; Zhou, ZB; Benbouzid, M	Boukoberine, Mohamed Nadir; Zhou, Zhibin; Benbouzid, Mohamed	A critical review on unmanned aerial vehicles power supply and energy management: Solutions, strategies, and prospects	APPLIED ENERGY	The interest in electric unmanned aerial vehicles (UAVs) is rapidly growing in recent years. The reason is that UAVs have abilities to perform some difficult or dangerous tasks, with high mobility, safety, and low cost. It should be noted that UAVs are revolutionizing many public services including real time monitoring, search and rescue, wildlife surveys, delivery services, wireless coverage, an…	0306-2619	1872-9118	255				113823	10.1016/j.apenergy.2019.113823
2019	Lou, B; Wang, GF; Huang, ZL; Ye, SJ	Lou, Bin; Wang, Gaofeng; Huang, Zhilong; Ye, Shangjun	Preliminary design and performance analysis of a solar-powered unmanned seaplane	PROCEEDINGS OF THE INSTITUTION OF MECHANICAL ENGINEERS PART G-JOURNAL OF AEROSPACE ENGINEERING	A solar-powered unmanned seaplane is proposed as a new strategy to avoid the challenges faced in a long nonstop solar-powered flight, and is especially designed for sea surveillance mission, like resource exploration, environmental monitoring, and observation of animal migration. A preliminary design of the solar-powered unmanned seaplane is carried out while its flight performance is analyzed la…	0954-4100	2041-3025	233	15	5606	5617		10.1177/0954410019852572
2019	Mangewa, LJ; Ndakidemi, PA; Munishi, LK	Mangewa, Lazaro J.; Ndakidemi, Patrick A.; Munishi, Linus K.	Integrating UAV Technology in an Ecological Monitoring System for Community Wildlife Management Areas in Tanzania	SUSTAINABILITY	Unmanned aerial vehicles (UAV) have recently emerged as a new remote sensing aerial platform, and they are seemingly advancing real-time data generation. Nonetheless, considerable uncertainties remain in the extent to which wildlife managers can integrate UAVs into ecological monitoring systems for wildlife and their habitats. In this review, we discuss the recent progress and gaps in UAV use in …		2071-1050	11	21			6116	10.3390/su11216116
2020	Inoue, S; Yamamoto, S; Ringhofer, M; Mendonca, RS; Hirata, S	Inoue, Sota; Yamamoto, Shinya; Ringhofer, Monamie; Mendonca, Renata S.; Hirata, Satoshi	Lateral position preference in grazing feral horses	ETHOLOGY	Behavioural lateralisation is an effective way for animals to manage daily tasks by specialising behaviour to either side of the body. Many types of lateralisation are linked to the function of each brain hemisphere. Lateralisation of monitoring behaviour in mother-infant relationships occurs in a wide range of mammals, where infants frequently use their left eye to monitor their mother. However,…	0179-1613	1439-0310	126	1	111	119		10.1111/eth.12966
2019	Scarpa, LJ; Pina, CI	Scarpa, Leonardo J.; Pina, Carlos I.	The use of drones for conservation: A methodological tool to survey caimans nests density	BIOLOGICAL CONSERVATION	The use of drones, or unmanned aerial vehicles (UAVs), is a burgeoning facet of conservation biology with the potential to revolutionize the way in which animals and habitats are monitored. Recently, the location and distribution of caiman nests were mainly carried out by helicopters, paramotoring, and small plane for the identification and validation of nesting sites. The methods chosen for coun…	0006-3207	1873-2917	238				108235	10.1016/j.biocon.2019.108235
2019	Schofield, G; Esteban, N; Katselidis, KA; Hays, GC	Schofield, Gail; Esteban, Nicole; Katselidis, Kostas A.; Hays, Graeme C.	Drones for research on sea turtles and other marine vertebrates - A review	BIOLOGICAL CONSERVATION	We review how unmanned aerial vehicles (UAVs), often referred to as drones, are being deployed to study the abundance and behaviour of sea turtles, identifying some of the commonalities and differences with studies on other marine vertebrates, including marine mammals and fish. UAV studies of all three groups primarily focus on obtaining estimates of abundance, distribution and density, while som…	0006-3207	1873-2917	238				108214	10.1016/j.biocon.2019.108214
2019	Old, JM; Lin, SH; Franklin, MJM	Old, Julie M.; Lin, Simon H.; Franklin, Michael J. M.	Mapping out bare-nosed wombat (Vombatus ursinus) burrows with the use of a drone	BMC ECOLOGY	Background: Wombats are large, nocturnal herbivores that build burrows in a variety of habitats, including grassland communities, and can come into conflict with people. Counting the number of active burrows provides information on the local distribution and abundance of wombats and could prove to be an important management tool to monitor population numbers over time. We compared traditional gro…		1472-6785	19	1			39	10.1186/s12898-019-0257-5
2019	Deacy, WW; Leacock, WB; Ward, EJ; Armstrong, JB	Deacy, William W.; Leacock, William B.; Ward, Eric J.; Armstrong, Jonathan B.	Aerial surveys cause large but ephemeral decreases in bear presence at salmon streams in Kodiak, Alaska	PLOS ONE	Aerial surveys are often used to monitor wildlife and fish populations, but rarely are the effects on animal behavior documented. For over 30 years, the Kodiak National Wildlife Refuge has conducted low-altitude aerial surveys to assess Kodiak brown bear (Ursus arctos middendorffi) space use and demographic composition when bears are seasonally congregated near salmon spawning streams in southwes…	1932-6203		14	9			e0222085	10.1371/journal.pone.0222085
2019	Lee, WY; Park, M; Hyun, CU	Lee, Won Young; Park, Mijin; Hyun, Chang-Uk	Detection of two Arctic birds in Greenland and an endangered bird in Korea using RGB and thermal cameras with an unmanned aerial vehicle (UAV)	PLOS ONE	Unmanned aerial vehicles (UAVs), so-called 'drones', have been widely used to monitor wild animals. Here, we tested a UAV with red, green, and blue (RGB) and thermal cameras to detect free-living birds in a high Arctic region in North Greenland and in a restricted area in the Republic of Korea. Small flocks of molting pink-footed geese (Anser brachyrhynchus) near sea ice and incubating common rin…	1932-6203		14	9			e0222088	10.1371/journal.pone.0222088
2019	Sorrell, KJ; Clarke, RH; Holmberg, R; McIntosh, RR	Sorrell, Karina J.; Clarke, Rohan H.; Holmberg, Ross; McIntosh, Rebecca R.	Remotely piloted aircraft improve precision of capture-mark-resight population estimates of Australian fur seals	ECOSPHERE	Remotely piloted aircraft (RPA or drones) have become a powerful tool for use in spatial and temporal ecology. Major benefits for environmental management, including improved accuracy and precision for population monitoring of fauna, are being realized. We used Australian fur seals (Arctocephalus pusillus) as a model system to assess how counts and capture-mark-resight (CMR) estimates derived fro…	2150-8925		10	8			e02812	10.1002/ecs2.2812
2019	Horton, TW; Hauser, N; Cassel, S; Klaus, KF; Fettermann, T; Keys, N	Horton, Travis W.; Hauser, Nan; Cassel, Shannon; Klaus, K. Frederika; Fettermann, Ticiana; Keys, Nicholas	Doctor Drone: Non-invasive Measurement of Humpback Whale Vital Signs Using Unoccupied Aerial System Infrared Thermography	FRONTIERS IN MARINE SCIENCE	Measuring and monitoring the behavior and biomedical condition of free-ranging whales remains a fundamental challenge in cetacean science and conservation. Advances in unoccupied aerial systems (UAS) and infrared thermography (IRT) create unprecedented opportunities to fill these knowledge gaps and advance our understanding of how cetaceans interact with the environment. Here, we show that non-in…		2296-7745	6				466	10.3389/fmars.2019.00466
2019	Vayssade, JA; Arquet, R; Bonneau, M	Vayssade, Jehan-Antoine; Arquet, Remy; Bonneau, Mathieu	Automatic activity tracking of goats using drone camera	COMPUTERS AND ELECTRONICS IN AGRICULTURE	Monitoring the position of animals in the outdoors can provide useful information in ecology and in agriculture. A common method is to use active sensors, such as GPS, to record their positions at constant intervals of time. But using active sensors can rapidly become expensive when several animals have to be monitored at the same time. Another method is to use a passive sensor to monitor the ent…	0168-1699	1872-7107	162		767	772		10.1016/j.compag.2019.05.021
2019	Lyons, MB; Brandis, KJ; Murray, NJ; Wilshire, JH; McCann, JA; Kingsford, RT; Callaghan, CT	Lyons, Mitchell B.; Brandis, Kate J.; Murray, Nicholas J.; Wilshire, John H.; McCann, Justin A.; Kingsford, Richard T.; Callaghan, Corey T.	Monitoring large and complex wildlife aggregations with drones	METHODS IN ECOLOGY AND EVOLUTION	Recent advances in drone technology have rapidly led to their use for monitoring and managing wildlife populations but a broad and generalised framework for their application to complex wildlife aggregations is still lacking. We present a generalised semi-automated approach where machine learning can map targets of interest in drone imagery, supported by predictive modelling for estimating wildli…	2041-210X	2041-2096	10	7	1024	1035		10.1111/2041-210X.13194
2019	Resnik, DB; Elliott, KC	Resnik, David B.; Elliott, Kevin C.	Using Drones to Study Human Beings: Ethical and Regulatory Issues	SCIENCE AND ENGINEERING ETHICS	Researchers have used drones to track wildlife populations, monitor forest fires, map glaciers, and measure air pollution but have only begun to consider how to use these unmanned aerial vehicles to study human beings. The potential use of drones to study public gatherings or other human activities raises novel issues of privacy, confidentiality, and consent, which this article explores in depth.…	1353-3452	1471-5546	25	3	707	718		10.1007/s11948-018-0032-6
2019	Cukor, J; Bartoska, J; Rohla, J; Sova, J; Machalek, A	Cukor, Jan; Bartoska, Jan; Rohla, Jan; Sova, Jan; Machalek, Antonin	Use of aerial thermography to reduce mortality of roe deer fawns before harvest	PEERJ	In agricultural landscape, there are thousands of young wild animals killed every year. Their deaths are caused mostly by agricultural fieldworks during spring harvest. Among the affected animals there are also fawns of roe deer (Capreolus capreolus), which react to danger by pressing themselves against the ground in order to be protected from predators. There were various methods tested in the p…	2167-8359		7				e6923	10.7717/peerj.6923
2019	Maniraj, P; Suresh, M; Logeswaran, T; Tamilarasu, P	Maniraj, P.; Suresh, M.; Logeswaran, T.; Tamilarasu, P.	Peacock Monitoring and Repellent System for Agriculture	BIOSCIENCE BIOTECHNOLOGY RESEARCH COMMUNICATIONS	Deforestation and environmental changes creates a conflict between human and animals. In present situation the natural resources are severely depleted, which makes animals to enter human living area and agricultural field. This conflict between human and animals put human life in danger. So, it is necessary to monitor the agricultural field continuously inorder to prevent the entry of animals. In…	0974-6455		12	3	68	70		10.21786/bbrc/SI/12.3/15
2019	Scholten, CN; Kamphuis, AJ; Vredevoogd, KJ; Lee-Strydhorst, KG; Atma, JL; Shea, CB; Lamberg, ON; Proppe, DS	Scholten, C. N.; Kamphuis, A. J.; Vredevoogd, K. J.; Lee-Strydhorst, K. G.; Atma, J. L.; Shea, C. B.; Lamberg, O. N.; Proppe, D. S.	Real-time thermal imagery from an unmanned aerial vehicle can locate ground nests of a grassland songbird at rates similar to traditional methods	BIOLOGICAL CONSERVATION	Monitoring songbird reproductive output is a well-established method for assessing population persistence, but reproductive studies on grassland songbirds often suffer from low sample sizes, high labor costs, and high levels of disturbance due to the difficulty of finding nests. However, technological advances in unmanned aerial vehicles (UAVs or drones) might improve our ability to locate these …	0006-3207	1873-2917	233		241	246		10.1016/j.biocon.2019.03.001
2019	Hong, SJ; Han, Y; Kim, SY; Lee, AY; Kim, G	Hong, Suk-Ju; Han, Yunhyeok; Kim, Sang-Yeon; Lee, Ah-Yeong; Kim, Ghiseok	Application of Deep-Learning Methods to Bird Detection Using Unmanned Aerial Vehicle Imagery	SENSORS	Wild birds are monitored with the important objectives of identifying their habitats and estimating the size of their populations. Especially in the case of migratory bird, they are significantly recorded during specific periods of time to forecast any possible spread of animal disease such as avian influenza. This study led to the construction of deep-learning-based object-detection models with …		1424-8220	19	7			1651	10.3390/s19071651
2019	Insua, JR; Utsumi, SA; Basso, B	Insua, Juan R.; Utsumi, Santiago A.; Basso, Bruno	Estimation of spatial and temporal variability of pasture growth and digestibility in grazing rotations coupling unmanned aerial vehicle (UAV) with crop simulation models	PLOS ONE	Systematic monitoring of pasture quantity and quality is important to match the herd forage demand (pasture removal by grazing or harvest) to the supply of forage with adequate nutritive value. The aim of this research was to monitor, assess and manage changes in pasture growth, morphology and digestibility by integrating information from an Unmanned Aerial Vehicle (UAV) and two process-based mod…	1932-6203		14	3			e0212773	10.1371/journal.pone.0212773
2019	Izmailov, AY	Izmailov, A. Yu.	Intelligent Technologies and Robotic Means in Agricultural Production	HERALD OF THE RUSSIAN ACADEMY OF SCIENCES	To increase production dramatically, it is necessary to implement digital intelligent technologies. With their help, it is possible to achieve a significant increase in labor productivity and crop yields and reduce energy and material costs. Digital machine technologies should be applied in crop growing, livestock breeding, power engineering, and storage and processing of agricultural products. I…	1019-3316	1555-6492	89	2	209	210		10.1134/S1019331619020072
2019	Ireland, AW; Palandro, DA; Garas, V; Woods, RW; Davi, RA; Butler, JD; Gibbens, DM; Gibbens, JS	Ireland, Alex W.; Palandro, David A.; Garas, Victory; Woods, Richard W.; Davi, Richard A.; Butler, Josh D.; Gibbens, Dyan M.; Gibbens, Jeffrey S., Jr.	Testing unmanned aerial systems for monitoring wildlife at night	WILDLIFE SOCIETY BULLETIN	Monitoring wildlife populations in proximity to industrial activities, including oil and gas operations, is critical to mitigating potential risk to both animals and workers, especially at night. We report on tests of mobile and power-tethered unmanned aerial systems (UASs) equipped with thermal cameras, comparing between these systems as well as to more conventional ground-based camera traps. Ou…	1938-5463		43	1	182	190		10.1002/wsb.952
2019	Muller, CG; Chilvers, BL; Barker, Z; Barnsdale, KP; Battley, PF; French, RK; McCullough, J; Samandari, F	Muller, Chris G.; Chilvers, B. Louise; Barker, Zane; Barnsdale, Kelvin P.; Battley, Phil F.; French, Rebecca K.; McCullough, Josh; Samandari, Fred	Aerial VHF tracking of wildlife using an unmanned aerial vehicle (UAV): comparing efficiency of yellow-eyed penguin (Megadyptes antipodes) nest location methods	WILDLIFE RESEARCH	Context. Locating cryptic animals is an important aspect of many wildlife management programs and research studies. However, this process can be inefficient, time-consuming and expensive. Unmanned aerial vehicles (UAVs), unmanned aircraft systems (UASs) or drones fitted with a camera are increasingly being used for counting and monitoring wildlife; however, these are often not suitable for crypti…	1035-3712	1448-5494	46	2	145	153	e0178448	10.1071/WR17147
2019	Nguyen, U; Glenn, EP; Dang, TD; Pham, LTH	Uyen Nguyen; Glenn, Edward P.; Thanh Duc Dang; Pham, Lien T. H.	Mapping vegetation types in semi-arid riparian regions using random forest and object-based image approach: A case study of the Colorado River Ecosystem, Grand Canyon, Arizona	ECOLOGICAL INFORMATICS	Riparian regions are essential habitats for wildlife and play a vital role in agricultural production, but they are highly dynamic environments impacted by fluctuations of water levels. Monitoring vegetation types along narrow river corridors is complicated and requires high-resolution imagery and advanced remote sensing techniques due to the mixture of vegetation and other types of land covers. …	1574-9541	1878-0512	50		43	50		10.1016/j.ecoinf.2018.12.006
2019	Clarke, LJ; Hill, RA; Ford, A; Herbert, RJH; Esteves, LS; Stillman, RA	Clarke, L. J.; Hill, R. A.; Ford, A.; Herbert, R. J. H.; Esteves, L. S.; Stillman, R. A.	Using remote sensing to quantify fishing effort and predict shorebird conflicts in an intertidal fishery	ECOLOGICAL INFORMATICS	Accurate estimates of fishing effort are necessary in order to assess interactions with the wider ecosystem and for defining and implementing appropriate management. In intertidal and inshore fisheries in which vessel monitoring systems (VMS) or logbook programmes may not be implemented, quantifying the distribution and intensity of fishing can be difficult. The most obvious effects of bottom-con…	1574-9541	1878-0512	50		136	148		10.1016/j.ecoinf.2019.01.011
2019	Gray, PC; Fleishman, AB; Klein, DJ; McKown, MW; Bezy, VS; Lohmann, KJ; Johnston, DW	Gray, Patrick C.; Fleishman, Abram B.; Klein, David J.; McKown, Matthew W.; Bezy, Vanessa S.; Lohmann, Kenneth J.; Johnston, David W.	A convolutional neural network for detecting sea turtles in drone imagery	METHODS IN ECOLOGY AND EVOLUTION	Marine megafauna are difficult to observe and count because many species travel widely and spend large amounts of time submerged. As such, management programmes seeking to conserve these species are often hampered by limited information about population levels. Unoccupied aircraft systems (UAS, aka drones) provide a potentially useful technique for assessing marine animal populations, but a centr…	2041-210X	2041-2096	10	3	345	355		10.1111/2041-210X.13132
2019	Burke, C; Rashman, M; Wich, S; Symons, A; Theron, C; Longmore, S	Burke, Claire; Rashman, Maisie; Wich, Serge; Symons, Andy; Theron, Cobus; Longmore, Steve	Optimizing observing strategies for monitoring animals using drone-mounted thermal infrared cameras	INTERNATIONAL JOURNAL OF REMOTE SENSING	The proliferation of relatively affordable off-the-shelf drones offers great opportunities for wildlife monitoring and conservation. Similarly the recent reduction in the cost of thermal infrared cameras also offers new promise in this field, as they have the advantage over conventional RGB cameras of being able to distinguish animals based on their body heat and being able to detect animals at n…	0143-1161	1366-5901	40	2	439	467		10.1080/01431161.2018.1558372
2019	Marx, A; McFarlane, D	Marx, Andrew; McFarlane, Donald	Combining Unmanned Aerial Systems and Satellite Data to Monitor Phenological Changes in Tropical Forests: A Case Study from Costa Rica	CASE STUDIES IN THE ENVIRONMENT	The migration of vegetation under the influence of climate change is of great interest to ecologists, but can be difficult to quantify-especially in less accessible landscapes. Monitoring land cover change through remote sensing has become the best solution, especially with the use of unmanned aerial systems (UASs; drones) as low-cost remote sensing platforms are able to collect data at high spat…	2473-9510		3	1				10.1525/cse.2018.001842
2019	Dujon, AM; Schofield, G	Dujon, Antoine M.; Schofield, Gail	Importance of machine learning for enhancing ecological studies using information-rich imagery	ENDANGERED SPECIES RESEARCH	There is increasing demand for efficient ways to process large volumes of data from visual-based remote-technology, such as unmanned aerial vehicles (UAVs) in ecology and conservation, with machine learning methods representing a promising avenue to address varying user demands. Here, we evaluated current trends in how machine learning and UAVs are used to process imagery data for detecting anima…	1863-5407	1613-4796	39		91	104		10.3354/esr00958
2018	Rush, GP; Clarke, LE; Stone, M; Wood, MJ	Rush, Graham P.; Clarke, Lucy E.; Stone, Meg; Wood, Matt J.	Can drones count gulls? Minimal disturbance and semiautomated image processing with an unmanned aerial vehicle for colony-nesting seabirds	ECOLOGY AND EVOLUTION	Accurate counts of wild populations are essential to monitor change through time, but some techniques demand specialist surveyors and may result in unacceptable disturbance or inaccurate counts. Recent technological developments in unmanned aerial vehicles (UAVs) offer great potential for a range of survey and monitoring approaches. They literally offer a bird's-eye view, but this increased power…	2045-7758		8	24	12322	12334		10.1002/ece3.4495
2018	Linchant, J; Lhoest, S; Quevauvillers, S; Lejeune, P; Vermeulen, C; Ngabinzeke, JS; Belanganayi, BL; Delvingt, W; Bouche, P	Linchant, Julie; Lhoest, Simon; Quevauvillers, Samuel; Lejeune, Philippe; Vermeulen, Cedric; Ngabinzeke, Jean Semeki; Belanganayi, Basile Luse; Delvingt, Willy; Bouche, Philippe	UAS imagery reveals new survey opportunities for counting hippos	PLOS ONE	Introduction The common hippopotamus Hippopotamus amphibius L. is a vulnerable species that requires efficient methods to monitor its populations for conservation purposes. Rapid evolution of civil drones provides new opportunities but survey protocols still need development. This study aims to determine the optimal flight parameters for accurate population estimates. A second objective is to eva…	1932-6203		13	11			e0206413	10.1371/journal.pone.0206413
2018	Hensel, E; Wenclawski, S; Layman, CA	Hensel, Enie; Wenclawski, Stephanie; Layman, Craig A.	Using a small, consumer-grade drone to identify and count marine megafauna in shallow habitats	LATIN AMERICAN JOURNAL OF AQUATIC RESEARCH	Large-bodied animals, megafauna, are disproportionately threatened and yet, remain relatively difficult to monitor, particularly true in the ocean. Consumer-grade drones have high definition imagery and offer a non-invasive way to monitor a subset of marine megafauna, especially those species that spend part of their life near the water's surface. However, a key question is the extent to which dr…	0718-560X	0717-7178	46	5	1025	1033		10.3856/vol46-issue5-fulltext-15
2018	Mustafa, O; Barbosa, A; Krause, DJ; Peter, HU; Vieira, G; Rummler, MC	Mustafa, Osama; Barbosa, Andres; Krause, Douglas J.; Peter, Hans-Ulrich; Vieira, Goncalo; Ruemmler, Marie-Charlott	State of knowledge: Antarctic wildlife response to unmanned aerial systems	POLAR BIOLOGY	The personal, commercial, and scientific use of unmanned aerial systems (UAS) in Antarctica has increased dramatically in recent years. Due to the potential benefits for, and negative impacts to, sensitive Antarctic wildlife, the use of UAS (also called unmanned aerial vehicles (UAV), remotely piloted aircraft systems (RPAS) or drones) is a widely discussed topic. Accordingly, an assessment of th…	0722-4060	1432-2056	41	11	2387	2398		10.1007/s00300-018-2363-9
2018	Gentle, M; Finch, N; Speed, J; Pople, A	Gentle, Matthew; Finch, Neal; Speed, James; Pople, Anthony	A comparison of unmanned aerial vehicles (drones) and manned helicopters for monitoring macropod populations	WILDLIFE RESEARCH	Context. Developments in the use of remote aircraft, or unmanned aerial systems (UAS), for ecological study have been rapid. Helicopter surveys have proven to be a reliable, repeatable method for broad-scale monitoring of harvested kangaroo populations in Australia's rangelands, but the recent availability of long-range UAS may offer improvements in detectability and cost efficiency. Aims. We aim…	1035-3712	1448-5494	45	7	586	594		10.1071/WR18034
2018	Kellenberger, B; Marcos, D; Tuia, D	Kellenberger, Benjamin; Marcos, Diego; Tuia, Devis	Detecting mammals in UAV images: Best practices to address a substantially imbalanced dataset with deep learning	REMOTE SENSING OF ENVIRONMENT	Knowledge over the number of animals in large wildlife reserves is a vital necessity for park rangers in their efforts to protect endangered species. Manual animal censuses are dangerous and expensive, hence Unmanned Aerial Vehicles (UAVs) with consumer level digital cameras are becoming a popular alternative tool to estimate livestock. Several works have been proposed that semi-automatically pro…	0034-4257	1879-0704	216		139	153		10.1016/j.rse.2018.06.028
2018	Ramos, EA; Maloney, B; Magnasco, MO; Reiss, D	Ramos, Eric A.; Maloney, Brigid; Magnasco, Marcelo O.; Reiss, Diana	Bottlenose Dolphins and Antillean Manatees Respond to Small Multi-Rotor Unmanned Aerial Systems	FRONTIERS IN MARINE SCIENCE	Unmanned aerial systems (UASs) are powerful tools for research and monitoring of wildlife. However, the effects of these systems on most marine mammals are largely unknown, preventing the establishment of guidelines that will minimize animal disturbance. In this study, we evaluated the behavioral responses of coastal bottlenose dolphins (Tursiops truncatus) and Antillean manatees (Trichechus mana…		2296-7745	5				316	10.3389/fmars.2018.00316
2018	Barbedo, JGA; Koenigkan, LV	Arnal Barbedo, Jayme Garcia; Koenigkan, Luciano Vieira	Perspectives on the use of unmanned aerial systems to monitor cattle	OUTLOOK ON AGRICULTURE	The use of unmanned aerial systems (UASs) in agriculture has been growing steadily in the last decade, but their use to monitor and count cattle has been very limited. This article analyses the reasons for this apparent lack of progress, considering both the technical challenges and the difficulties in defining target users who would benefit from a UAS-based system for monitoring cattle. Such an …	0030-7270	2043-6866	47	3	214	222		10.1177/0030727018781876
2018	Schuette, P; Namukonde, N; Becker, MS; Watson, FGR; Creel, S; Chifunte, C; Matandiko, W; Millhouser, P; Rosenblatt, E; Sanguinetti, C	Schuette, Paul; Namukonde, Ngawo; Becker, Matthew S.; Watson, Fred G. R.; Creel, Scott; Chifunte, Clive; Matandiko, Wigganson; Millhouser, Paul; Rosenblatt, Elias; Sanguinetti, Carolyn	Boots on the ground: in defense of low-tech, inexpensive, and robust survey methods for Africa's under-funded protected areas	BIODIVERSITY AND CONSERVATION	Protected area managers need reliable information to detect spatial and temporal trends of the species they intend to protect. This information is crucial for population monitoring, understanding ecological processes, and evaluating the effectiveness of management and conservation policies. In under-funded protected areas, managers often prioritize ungulates and carnivores for monitoring given th…	0960-3115	1572-9710	27	9	2173	2191		10.1007/s10531-018-1529-7
2018	Ezat, MA; Fritsch, CJ; Downs, CT	Ezat, Mohamed A.; Fritsch, Camille J.; Downs, Colleen T.	Use of an unmanned aerial vehicle (drone) to survey Nile crocodile populations: A case study at Lake Nyamithi, Ndumo game reserve, South Africa	BIOLOGICAL CONSERVATION	Observer bias and inexperience are challenging aspects of crocodile survey methods for determining population numbers and structure. Aerial surveys with either a helicopter or a fixed winged aircraft are generally preferred methods to ground surveys; however, the high cost of the former is a limiting factor. Recently unmanned aerial vehicles (UAVs) or drones have been proposed for surveys because…	0006-3207	1873-2917	223		76	81		10.1016/j.biocon.2018.04.032
2018	McIntosh, RR; Holmberg, R; Dann, P	McIntosh, Rebecca R.; Holmberg, Ross; Dann, Peter	Looking Without Landing-Using Remote Piloted Aircraft to Monitor Fur Seal Populations Without Disturbance	FRONTIERS IN MARINE SCIENCE	Technical advances in monitoring devices, specifically drones, are allowing managers and scientists to obtain quality information on ecosystem health with minimal disturbance to ecosystems and the wildlife they support. Temporal and spatial indicators of ecosystem health, such as population size and/or abundance estimates of marine mammals are the basis for our understanding and prediction of eco…		2296-7745	5				202	10.3389/fmars.2018.00202
2018	Thapa, GJ; Thapa, K; Thapa, R; Jnawali, SR; Wich, SA; Poudyal, LP; Karki, S	Thapa, Gokarna Jung; Thapa, Kanchan; Thapa, Ramesh; Jnawali, Shant Raj; Wich, Serge A.; Poudyal, Laxman Prasad; Karki, Suraj	Counting crocodiles from the sky: monitoring the critically endangered gharial (Gavialis gangeticus) population with an unmanned aerial vehicle (UAV)	JOURNAL OF UNMANNED VEHICLE SYSTEMS	Technology is rapidly changing the methods used in the field of wildlife monitoring. Unmanned aerial vehicles (UAV) are an example of a new technology that allows biologists to take to the air to monitor wildlife. A fixed-wing UAV was used to monitor the critically endangered gharial population along 46 km of the Babai River in Bardia National Park, Nepal. The UAV was flown at an altitude of 80 m…	2291-3467		6	2	71	82		10.1139/juvs-2017-0026
2018	Kloepper, LN; Kinniry, M	Kloepper, Laura N.; Kinniry, Morgan	Recording animal vocalizations from a UAV: bat echolocation during roost re-entry	SCIENTIFIC REPORTS	Unmanned aerial vehicles (UAVs) are rising in popularity for wild life monitoring, but direct recordings of animal vocalizations have not yet been accomplished, likely due to the noise generated by the UAV. Echolocating bats, especially Tadarid alpha brasiliensis, are good candidates for UAV recording due to their high-speed, high-altitude flight. Here, we use a UAV to record the signals of bats …	2045-2322		8				7779	10.1038/S41598-018-26122-Z
2018	Weinstein, BG	Weinstein, Ben G.	A computer vision for animal ecology	JOURNAL OF ANIMAL ECOLOGY	1. A central goal of animal ecology is to observe species in the natural world. The cost and challenge of data collection often limit the breadth and scope of ecological study. Ecologists often use image capture to bolster data collection in time and space. However, the ability to process these images remains a bottleneck. 2. Computer vision can greatly increase the efficiency, repeatability and …	0021-8790	1365-2656	87	3	533	545		10.1111/1365-2656.12780
2018	Zhou, ZP; Irizarry, J; Lu, Y	Zhou, Zhipeng; Irizarry, Javier; Lu, Ying	A Multidimensional Framework for Unmanned Aerial System Applications in Construction Project Management	JOURNAL OF MANAGEMENT IN ENGINEERING	Unmanned aerial systems (UAS) are becoming prevalent and can be equipped with cameras, sensors, or other intelligent devices that offer useful information for various nonmilitary applications, such as environmental monitoring, wildlife surveying, aerial photography, and traffic surveillance. However, a widespread application of the UAS technology has not taken place in the construction industry. …	0742-597X	1943-5479	34	3			4018004	10.1061/(ASCE)ME.1943-5479.0000597
2018	Hodgson, JC; Mott, R; Baylis, SM; Pham, TT; Wotherspoon, S; Kilpatrick, AD; Segaran, RR; Reid, I; Terauds, A; Koh, LP	Hodgson, Jarrod C.; Mott, Rowan; Baylis, Shane M.; Pham, Trung T.; Wotherspoon, Simon; Kilpatrick, Adam D.; Segaran, Ramesh Raja; Reid, Ian; Terauds, Aleks; Koh, Lian Pin	Drones count wildlife more accurately and precisely than humans	METHODS IN ECOLOGY AND EVOLUTION	1. Knowing how many individuals are in a wildlife population allows informed management decisions to be made. Ecologists are increasingly using technologies, such as remotely piloted aircraft (RPA; commonly known as drones, unmanned aerial systems or unmanned aerial vehicles), for wildlife monitoring applications. Although RPA are widely touted as a cost-effective way to collect high-quality wild…	2041-210X	2041-2096	9	5	1160	1167		10.1111/2041-210X.12974
2018	Gu, JJ; Su, T; Wang, QH; Du, XJ; Guizani, M	Gu, Jingjing; Su, Tao; Wang, Qiuhong; Du, Xiaojiang; Guizani, Mohsen	Multiple Moving Targets Surveillance Based on a Cooperative Network for Multi-UAV	IEEE COMMUNICATIONS MAGAZINE	With the development of better links, enhanced coverage, comprehensive data resources, and network system stability, the cooperative network formed by wireless sensor networks and unmanned aerial vehicles is envisioned to provide immediate and long-term benefits in military and civilian fields. Previous works mainly focus on how to use UAVs to assist WSNs in sensing and data collection jobs, or t…	0163-6804	1558-1896	56	4	82	89		10.1109/MCOM.2018.1700422
2018	Juanes, F	Juanes, Francis	Visual and acoustic sensors for early detection of biological invasions: Current uses and future potential	JOURNAL FOR NATURE CONSERVATION	Development of tools for early detection of invasive species is critically important as the threat of global invasions increase. Early detection as applied to invasive species is a system of active and passive surveillance to find and verify the identity of new invaders as quickly and efficiently as possible. The earlier such species can be detected the more feasible their control and potential e…	1617-1381	1618-1093	42		7	11		10.1016/j.jnc.2018.01.003
2018	Aniceto, AS; Biuw, M; Lindstrom, U; Solbo, SA; Broms, F; Carroll, J	Aniceto, Ana S.; Biuw, Martin; Lindstrom, Ulf; Solbo, Stian A.; Broms, Fredrik; Carroll, Jolynn	Monitoring marine mammals using unmanned aerial vehicles: quantifying detection certainty	ECOSPHERE	Unmanned aerial vehicles (UAVs) are increasingly being recognized as potentially useful for detection of marine mammals in their natural habitats, but an important consideration is the associated uncertainties in animal detection. We present a study based on field trials using UAVs to carry out image-based monitoring of cetaceans in two fjords in northern Norway. We conducted 12 missions to asses…	2150-8925		9	3			e02122	10.1002/ecs2.2122
2018	Connor, DT; Martin, PG; Smith, NT; Payne, L; Hutton, C; Payton, OD; Yamashiki, Y; Scott, TB	Connor, D. T.; Martin, P. G.; Smith, N. T.; Payne, L.; Hutton, C.; Payton, O. D.; Yamashiki, Y.; Scott, T. B.	Application of airborne photogrammetry for the visualisation and assessment of contamination migration arising from a Fukushima waste storage facility	ENVIRONMENTAL POLLUTION	Airborne systems such as lightweight and highly portable unmanned aerial vehicles (UAVs) are becoming increasingly widespread in both academia and industry - with an ever-increasing range of applications, including (but not limited to), air quality sampling, wildlife monitoring and land-use mapping. In this work, high-resolution airborne photogrammetry obtained using a multi-rotor system operatin…	0269-7491	1873-6424	234		610	619		10.1016/j.envpol.2017.10.098
2018	Olsoy, PJ; Shipley, LA; Rachlow, JL; Forbey, JS; Glenn, NF; Burgess, MA; Thornton, DH	Olsoy, Peter J.; Shipley, Lisa A.; Rachlow, Janet L.; Forbey, Jennifer S.; Glenn, Nancy F.; Burgess, Matthew A.; Thornton, Daniel H.	Unmanned aerial systems measure structural habitat features for wildlife across multiple scales	METHODS IN ECOLOGY AND EVOLUTION	Assessing habitat quality is a primary goal of ecologists. However, evaluating habitat features that relate strongly to habitat quality at fine-scale resolutions across broad-scale extents is challenging. Unmanned aerial systems (UAS) provide an avenue for bridging the gap between relatively high spatial resolution, low spatial extent field-based habitat quality measurements and lower spatial res…	2041-210X	2041-2096	9	3	594	604		10.1111/2041-210X.12919
2018	Stark, DJ; Vaughan, IP; Evans, LJ; Kler, H; Goossens, B	Stark, Danica J.; Vaughan, Ian P.; Evans, Luke J.; Kler, Harjinder; Goossens, Benoit	Combining drones and satellite tracking as an effective tool for informing policy change in riparian habitats: a proboscis monkey case study	REMOTE SENSING IN ECOLOGY AND CONSERVATION	Rapid reaction times to undesirable events are becoming increasingly important for the protection and conservation of habitats and species. This study demonstrates how Unmanned Aerial Vehicles, or drones, and satellite tracking of individual animals can be combined to identify important conservation issues (e.g. deforestation). When quickly disseminated, the information can lead to a rapid change…		2056-3485	4	1	44	52		10.1002/rse2.51
2018	Hays, GC; Alcoverro, T; Christianen, MJA; Duarte, CM; Hamann, M; Macreadie, PI; Marsh, HD; Rasheed, MA; Thums, M; Unsworth, RKE; York, PH; Esteban, N	Hays, Graeme C.; Alcoverro, Teresa; Christianen, Marjolijn J. A.; Duarte, Carlos M.; Hamann, Mark; Macreadie, Peter, I; Marsh, Helene D.; Rasheed, Michael A.; Thums, Michele; Unsworth, Richard K. E.; York, Paul H.; Esteban, Nicole	New Tools to Identify the Location of Seagrass Meadows: Marine Grazers as Habitat Indicators	FRONTIERS IN MARINE SCIENCE	Seagrasses are hugely valuable to human life, but the global extent of seagrass meadows remains unclear. As evidence of their value, a United Nations program exists (http://data. unep-wcmc.org/datasets/7) to try and assess their distribution and there has been a call from 122 scientists across 28 countries for more work to manage, protect and monitor seagrass meadows (http://www. bbc.com/news/sci…		2296-7745	5				9	10.3389/fmars.2018.00009
2018	Weimerskirch, H; Prudor, A; Schull, Q	Weimerskirch, Henri; Prudor, Aurelien; Schull, Quentin	Flights of drones over sub-Antarctic seabirds show species- and status-specific behavioural and physiological responses	POLAR BIOLOGY	Drones and unmanned aerial vehicles are increasingly used in research on wildlife. Their wide applications can also give interesting insights into habitat use and population distribution. However, the disturbance they might be responsible for, on species and especially in protected areas has yet to be investigated. We assessed and compared the behavioural response of 11 southern seabird species a…	0722-4060	1432-2056	41	2	259	266		10.1007/s00300-017-2187-z
2018	Saarinen, N; Vastaranta, M; Nasi, R; Rosnell, T; Hakala, T; Honkavaara, E; Wulder, MA; Luoma, V; Tommaselli, AMG; Imai, NN; Ribeiro, EAW; Guimaraes, RB; Holopainen, M; Hyyppa, J	Saarinen, Ninni; Vastaranta, Mikko; Nasi, Roope; Rosnell, Tomi; Hakala, Teemu; Honkavaara, Eija; Wulder, Michael A.; Luoma, Ville; Tommaselli, Antonio M. G.; Imai, Nilton N.; Ribeiro, Eduardo A. W.; Guimaraes, Raul B.; Holopainen, Markus; Hyyppa, Juha	Assessing Biodiversity in Boreal Forests with UAV-Based Photogrammetric Point Clouds and Hyperspectral Imaging	REMOTE SENSING	Forests are the most diverse terrestrial ecosystems and their biological diversity includes trees, but also other plants, animals, and micro-organisms. One-third of the forested land is in boreal zone; therefore, changes in biological diversity in boreal forests can shape biodiversity, even at global scale. Several forest attributes, including size variability, amount of dead wood, and tree speci…		2072-4292	10	2			338	10.3390/rs10020338
2018	Tomljanovic, K; Nosek, H; Pernar, R; Grubesic, M	Tomljanovic, Kristijan; Nosek, Helena; Pernar, Renata; Grubesic, Marijan	POSSIBILITIES OF APPLYING LIGHTWEIGHT UNMANNED AERIAL VEHICLES TO BIG GAME COUNTING	SUMARSKI LIST	Different techniques and technologies are being used in wild animal research. Goals of such research and monitoring are various, most common are numbers per area and size of population for a researched species (Myslenkov i Miquelle, 2015). Development of new techniques and technologies that are used everyday in practial wild animal monitoring has made many tasks much easier and more precise, usag…	0373-1332	1846-9140	142	11-12	621	627		10.31298/sl.142.11-12.6
2018	Koptev, SV; Skudneva, OV	Koptev, S. V.; Skudneva, O. V.	On the Applicability of UAV in Forestry Practice	LESNOY ZHURNAL-FORESTRY JOURNAL	The article discusses the features and capabilities of unmanned aerial vehicles (UAVs) in forestry practice on the basis of the international experience. The focus is on the problem of defining and linking the boundaries of forest sites to the map of the area using a satellite navigation system (SNS) receiver, placed on an UAV. The use of UAVs eliminates errors of the SNS operation due to its ins…	0536-1036			1	130	138		10.17238/issn0536-1036.2018.1.130
2018	Su, XK; Dong, SK; Liu, SL; Cracknell, AP; Zhang, Y; Wang, XX; Liu, GH	Su, Xukun; Dong, Shikui; Liu, Shiliang; Cracknell, Arthur Philip; Zhang, Yong; Wang, Xuexia; Liu, Guohua	Using an unmanned aerial vehicle (UAV) to study wild yak in the highest desert in the world	INTERNATIONAL JOURNAL OF REMOTE SENSING	The wild yak (Bos mutus) is an endemic and flagship species on the Qinghai-Tibetan Plateau (QTP) of China. Because this is an aggressive and huge ungulate living in the Altun National Nature Reserve (ANNR), monitoring and surveying of wild yaks at a close distance is very difficult. An Unmanned Aerial Vehicle (UAV) offers a useful and effective tool to monitor and survey wild yaks. We used this a…	0143-1161	1366-5901	39	15-16	5490	5503		10.1080/01431161.2018.1441570
2018	Witczuk, J; Pagacz, S; Zmarz, A; Cypel, M	Witczuk, Julia; Pagacz, Stanislaw; Zmarz, Anna; Cypel, Maciej	Exploring the feasibility of unmanned aerial vehicles and thermal imaging for ungulate surveys in forests - preliminary results	INTERNATIONAL JOURNAL OF REMOTE SENSING	Effective wildlife management and conservation require reliable assessments of animal abundance. However, no ungulate monitoring methods is entirely satisfying in terms of cost-effectiveness and accuracy. A new method combining unmanned aerial vehicles (drones) and thermal infrared (TIR) imaging may have great potential as a tool for ungulate surveys. Drones enable safe operations at low flying a…	0143-1161	1366-5901	39	15-16	5504	5521		10.1080/01431161.2017.1390621
2018	Shrestha, Y; Lapeyre, R	Shrestha, Yashaswi; Lapeyre, Renaud	Modern Wildlife Monitoring Technologies: Conservationists versus Communities? A Case Study: The Terai-Arc Landscape, Nepal	CONSERVATION & SOCIETY	The use of new and advanced wildlife monitoring technologies is shifting the paradigm of wildlife conservation and management. These digital technologies are helping wildlife conservationists and researchers around the world to monitor and manage wildlife with more precision and efficiency. However, this research study highlights some of the key drawbacks of using such modem technologies for wild…	0972-4923	0975-3133	16	1	91	101		10.4103/cs.cs_16_83
2018	Laguna, E; Barasona, JA; Triguero-Ocana, R; Mulero-Pazmany, M; Negro, JJ; Vicente, J; Acevedo, P	Laguna, Eduardo; Barasona, Jose A.; Triguero-Ocana, Roxana; Mulero-Pazmany, Margarita; Jose Negro, Juan; Vicente, Joaquin; Acevedo, Pelayo	The relevance of host overcrowding in wildlife epidemiology: A new spatially explicit aggregation index	ECOLOGICAL INDICATORS	Species distribution and population abundance are keystone patterns in ecology, and currently also in epidemiology. The aggregation of individuals in the population is closely related to distribution and abundance, but they are not totally equivalent patterns. Despite the great efforts made in recent decades to harmonise the sampling protocols used to collect distribution and abundance data, stud…	1470-160X	1872-7034	84		695	700		10.1016/j.ecolind.2017.09.039
2018	Barnas, A; Newman, R; Felege, CJ; Corcoran, MP; Hervey, SD; Stechmann, TJ; Rockwell, RF; Ellis-Felege, SN	Barnas, Andrew; Newman, Robert; Felege, Christopher J.; Corcoran, Michael P.; Hervey, Samuel D.; Stechmann, Tanner J.; Rockwell, Robert F.; Ellis-Felege, Susan N.	Evaluating behavioral responses of nesting lesser snow geese to unmanned aircraft surveys	ECOLOGY AND EVOLUTION	Unmanned aircraft systems (UAS) are relatively new technologies gaining popularity among wildlife biologists. As with any new tool in wildlife science, operating protocols must be developed through rigorous protocol testing. Few studies have been conducted that quantify the impacts UAS may have on unhabituated individuals in the wild using standard aerial survey protocols. We evaluated impacts of…	2045-7758		8	2	1328	1338		10.1002/ece3.3731
2017	Hamilton, D; Bowerman, M; Colwell, J; Donohoe, G; Myers, B	Hamilton, Dale; Bowerman, Mikhail; Colwell, Jason; Donohoe, Greg; Myers, Barry	Spectroscopic analysis for mapping wildland fire effects from remotely sensed imagery	JOURNAL OF UNMANNED VEHICLE SYSTEMS	Wildfire burns 1.5-4 million ha of land across the United States each year, contributing to postfire erosion, ecosystem degradation, and loss of wildlife habitat. Unmanned aircraft systems and sensor miniaturization offer a new paradigm, providing an affordable, safe, and responsive on-demand tool for monitoring fire effects at a much finer spatial resolution than is possible with current technol…	2291-3467		5	4	146	158		10.1139/juvs-2016-0019
2017	Biserkov, VY; Lukanov, SP	Biserkov, Vulko Y.; Lukanov, Simeon P.	Unmanned Aerial Vehicles (UAVs) for Surveying Freshwater Turtle Populations: Methodology Adjustment	ACTA ZOOLOGICA BULGARICA	Unmanned aerial vehicles (colloquially known as drones) equipped with a high-definition camera are regularly used in the monitoring of various species. To our knowledge, the current study presents first data on the successful application of drones in herpetological studies. In two field trips (ca. 50 min of aerial observation time), we registered a total of nine adult specimens of two freshwater …	0324-0770				161	163
2017	Krause, DJ; Hinke, JT; Perryman, WL; Goebel, ME; LeRoi, DJ	Krause, Douglas J.; Hinke, Jefferson T.; Perryman, Wayne L.; Goebel, Michael E.; LeRoi, Donald J.	An accurate and adaptable photogrammetric approach for estimating the mass and body condition of pinnipeds using an unmanned aerial system	PLOS ONE	Measurements of body size and mass are fundamental to pinniped population management and research. Manual measurements tend to be accurate but are invasive and logistically challenging to obtain. Ground-based photogrammetric techniques are less invasive, but inherent limitations make them impractical for many field applications. The recent proliferation of unmanned aerial systems (UAS) in wildlif…	1932-6203		12	11			e0187465	10.1371/journal.pone.0187465
2017	Rey, N; Volpi, M; Joost, S; Tuia, D	Rey, Nicolas; Volpi, Michele; Joost, Stephane; Tuia, Devis	Detecting animals in African Savanna with UAVs and the crowds	REMOTE SENSING OF ENVIRONMENT	Unmanned aerial vehicles (UAVs) offer new opportunities for wildlife monitoring, with several advantages over traditional field-based methods. They have readily been used to count birds, marine mammals and large herbivores in different environments, tasks which are routinely performed through manual counting in large collections of images. In this paper, we propose a semi-automatic system able to…	0034-4257	1879-0704	200		341	351		10.1016/j.rse.2017.08.026
2017	Tremblay, JA; Desrochers, A; Aubry, Y; Pace, P; Bird, DM	Tremblay, Junior A.; Desrochers, Andre; Aubry, Yves; Pace, Paul; Bird, David M.	A low-cost technique for radio-tracking wildlife using a small standard unmanned aerial vehicle	JOURNAL OF UNMANNED VEHICLE SYSTEMS	Recent advances in using unmanned aerial vehicles (UAVs) to study wildlife offer promise and may improve data collection efficiency, and small UAVs, such as multirotor platforms, are suitable for this task because they are easy to deploy, can fly over terrain that is difficult to access on foot, and can be programmed to follow specific trajectories. The objective of our study was to determine whe…	2291-3467		5	3	102	108		10.1139/juvs-2016-0021
2017	Apprill, A; Miller, CA; Moore, MJ; Durban, JW; Fearnbach, H; Barrett-Lennard, LG	Apprill, Amy; Miller, Carolyn A.; Moore, Michael J.; Durban, John W.; Fearnbach, Holly; Barrett-Lennard, Lance G.	Extensive Core Microbiome in Drone-Captured Whale Blow Supports a Framework for Health Monitoring	MSYSTEMS	The pulmonary system is a common site for bacterial infections in cetaceans, but very little is known about their respiratory microbiome. We used a small, unmanned hexacopter to collect exhaled breath condensate (blow) from two geographically distinct populations of apparently healthy humpback whales (Megaptera novaeangliae), sampled in the Massachusetts coastal waters off Cape Cod (n = 17) and c…	2379-5077		2	5			e00119-17	10.1128/mSystems.00119-17
2017	Oliveira, JSF; Georgiadis, G; Campello, S; Brandao, RA; Ciuti, S	Oliveira, Julia S. Fuerstenau; Georgiadis, George; Campello, Silvana; Brandao, Reuber A.; Ciuti, Simone	Improving river dolphin monitoring using aerial surveys	ECOSPHERE	Obtaining correct abundance estimates to model population dynamics and promptly adjust management actions is a key goal of threatened species conservation. For elusive aquatic mammals like river dolphins, however, gathering such basic data can be extremely challenging. River dolphins in shallow waters are surveyed from canoes, with the (untested) assumption that visual counts are exhaustive estim…	2150-8925		8	8			e01912	10.1002/ecs2.1912
2017	Moxley, JH; Bogomolni, A; Hammill, MO; Moore, KMT; Polito, MJ; Sette, L; Sharp, WB; Waring, GT; Gilbert, JR; Halpin, PN; Johnston, DW	Moxley, Jerry H.; Bogomolni, Andrea; Hammill, Mike O.; Moore, Kathleen M. T.; Polito, Michael J.; Sette, Lisa; Sharp, W. Brian; Waring, Gordon T.; Gilbert, James R.; Halpin, Patrick N.; Johnston, David W.	Google Haul Out: Earth Observation Imagery and Digital Aerial Surveys in Coastal Wildlife Management and Abundance Estimation	BIOSCIENCE	As the sampling frequency and resolution of Earth observation imagery increase, there are growing opportunities for novel applications in population monitoring. New methods are required to apply established analytical approaches to data collected from new observation platforms (e.g., satellites and unmanned aerial vehicles). Here, we present a method that estimates regional seasonal abundances fo…	0006-3568	1525-3244	67	8	760	768		10.1093/biosci/bix059
2017	Mafanya, M; Tsele, P; Botai, J; Manyama, P; Swart, B; Monate, T	Mafanya, Madodomzi; Tsele, Philemon; Botai, Joel; Manyama, Phetole; Swart, Barend; Monate, Thabang	Evaluating pixel and object based image classification techniques for mapping plant invasions from UAV derived aerial imagery: Harrisia pomanensis as a case study	ISPRS JOURNAL OF PHOTOGRAMMETRY AND REMOTE SENSING	Invasive alien plants (IAPs) not only pose a serious threat to biodiversity and water resources but also have impacts on human and animal wellbeing. To support decision making in IAPs monitoring, semi automated image classifiers which are capable. of extracting valuable information in remotely sensed data are vital. This study evaluated the mapping accuracies of supervised and unsupervised image …	0924-2716	1872-8235	129		1	11		10.1016/j.isprsjprs.2017.04.009
2017	Borrelle, SB; Fletcher, AT	Borrelle, Stephanie B.; Fletcher, Andrew T.	WILL DRONES REDUCE INVESTIGATOR DISTURBANCE TO SURFACE-NESTING BIRDS?	MARINE ORNITHOLOGY	Many colonial-nesting seabird species are highly threatened, and their conservation is a global priority. Yet long-term population data for many species are sporadic. given the location. physical nature of many colonies, and known negative impacts of investigator interaction. The low cost of unmanned aerial systems (UASs), or drones, has democratized access to remote sensing data with high spatia…	1018-3337	2074-1235	45	1	89	94
2017	Hua, LZ; Shao, GF	Hua, Lizhong; Shao, Guofan	The progress of operational forest fire monitoring with infrared remote sensing	JOURNAL OF FORESTRY RESEARCH	Forest wildfires pose significant and growing threats to human safety, wildlife habitat, regional economies and global climate change. It is crucial that forest fires be subject to timely and accurate monitoring by forest fire managers and other stake-holders. Measurement by spaceborne equipment has become a practical and appealing method to monitor the occurrence and development of forest wildfi…	1007-662X	1993-0607	28	2	215	229		10.1007/s11676-016-0361-8
2017	Qayyum, A; Malik, AS; Saad, NM; bin Abdullah, MF; Iqbal, M; Rasheed, W; Bin Ab Abdullah, A; Jaafar, MYH	Qayyum, Abdul; Malik, Aamir Saeed; Saad, Naufal M.; bin Abdullah, Mohd Faris; Iqbal, Mahboob; Rasheed, Waqas; Bin Ab Abdullah, Ab Rashid; Jaafar, Mohd Yaakob Hj	Measuring height of high-voltage transmission poles using unmanned aerial vehicle (UAV) imagery	IMAGING SCIENCE JOURNAL	Aerial imagery is important in remote sensing applications. Unmanned aerial vehicle (UAV) has a wide range of applications in remote sensing and presents a substantial cost-effective solution when monitoring objects on the earth's surface. Moreover, object detection and classification are important aspects of global information system, especially for remote sensing applications and power line mon…	1368-2199	1743-131X	65	3	137	150		10.1080/13682199.2017.1299304
2017	Longmore, SN; Collins, RP; Pfeifer, S; Fox, SE; Mulero-Pazmany, M; Bezombes, F; Goodwin, A; Ovelar, MD; Knapen, JH; Wich, SA	Longmore, S. N.; Collins, R. P.; Pfeifer, S.; Fox, S. E.; Mulero-Pazmany, M.; Bezombes, F.; Goodwin, A.; Ovelar, M. De Juan; Knapen, J. H.; Wich, S. A.	Adapting astronomical source detection software to help detect animals in thermal images obtained by unmanned aerial systems	INTERNATIONAL JOURNAL OF REMOTE SENSING	In this article, we describe an unmanned aerial system equipped with a thermal-infrared camera and software pipeline that we have developed to monitor animal populations for conservation purposes. Taking a multi-disciplinary approach to tackle this problem, we use freely available astronomical source detection software and the associated expertise of astronomers, to efficiently and reliably detec…	0143-1161	1366-5901	38	8-10	2623	2638		10.1080/01431161.2017.1280639
2017	Forbey, JS; Patricelli, GL; Delparte, DM; Krakauer, AH; Olsoy, PJ; Fremgen, MR; Nobler, JD; Spaete, LP; Shipley, LA; Rachlow, JL; Dirksen, AK; Perry, A; Richardson, BA; Glenn, NF	Forbey, Jennifer Sorensen; Patricelli, Gail L.; Delparte, Donna M.; Krakauer, Alan H.; Olsoy, Peter J.; Fremgen, Marcella R.; Nobler, Jordan D.; Spaete, Lucas P.; Shipley, Lisa A.; Rachlow, Janet L.; Dirksen, Amy K.; Perry, Anna; Richardson, Bryce A.; Glenn, Nancy F.	Emerging technology to measure habitat quality and behavior of grouse: examples from studies of greater sage-grouse	WILDLIFE BIOLOGY	An increasing number of threats, both natural (e.g. fires, drought) and anthropogenic (e.g. agriculture, infrastructure development), are likely to affect both availability and quality of plants that grouse rely on for cover and food. As such, there is an increasing need to monitor plants and their use by grouse over space and time to better predict how changes in habitat quality influence the be…	0909-6396	1903-220X					wlb. 00238	10.2981/wlb.00238
2017	Weber, S; Knaus, F	Weber, Stefan; Knaus, Florian	Using drones as a monitoring tool to detect evidence of winter sports activities in a protected mountain area	ECO MONT-JOURNAL ON PROTECTED MOUNTAIN AREAS RESEARCH	The capercaillie (Tetrao urogallus) is a mountain grouse species listed in the Red Lists of Switzerland and other countries of Europe. As a consequence of its conservation status, human activities are restricted in most of its remaining habitats. One sub-population of the capercaillie is located in the Entlebuch UNESCO Biosphere Reserve. The margins of one of its territories are increasingly used…	2073-106X	2073-1558	9	1	30	34		10.1553/eco.mont-9-1s30
2017	Pirotta, V; Smith, A; Ostrowski, M; Russell, D; Jonsen, ID; Grech, A; Harcourt, R	Pirotta, Vanessa; Smith, Alastair; Ostrowski, Martin; Russell, Dylan; Jonsen, Ian D.; Grech, Alana; Harcourt, Robert	An Economical Custom-Built Drone for Assessing Whale Health	FRONTIERS IN MARINE SCIENCE	Drones or Unmanned Aerial Vehicles (UAVs) have huge potential to improve the safety and efficiency of sample collection from wild animals under logistically challenging circumstances. Here we present a method for surveying population health that uses UAVs to sample respiratory vapor, 'whale blow', exhaled by free-swimming humpback whales (Megaptera novaeangliae), and coupled this with amplificati…		2296-7745	4				425	10.3389/fmars.2017.00425
2016	Scobie, CA; Hugenholtz, CH	Scobie, Corey A.; Hugenholtz, Chris H.	Wildlife Monitoring With Unmanned Aerial Vehicles: Quantifying Distance to Auditory Detection	WILDLIFE SOCIETY BULLETIN	There is growing application of small unmanned aerial vehicles (UAVs) for detecting, enumerating, and monitoring wildlife. However, little is known about how the sound from UAVs may be affecting wildlife being studied. We quantified sound levels of 2 UAVs to determine minimum altitudes they can fly before being aurally detected by wildlife. We tested a small quadcopter (SkyRanger; Aeryon Labs, In…	1938-5463		40	4	781	785		10.1002/wsb.700
2016	Chabot, D; Francis, CM	Chabot, Dominique; Francis, Charles M.	Computer-automated bird detection and counts in high-resolution aerial images: a review	JOURNAL OF FIELD ORNITHOLOGY	Bird surveys conducted using aerial images can be more accurate than those using airborne observers, but can also be more time-consuming if images must be analyzed manually. Recent advances in digital cameras and image-analysis software offer unprecedented potential for computer-automated bird detection and counts in high-resolution aerial images. We review the literature on this subject and prov…	0273-8570	1557-9263	87	4	343	359		10.1111/jofo.12171
2016	McClelland, GTW; Bond, AL; Sardana, A; Glass, T	McClelland, Gregory T. W.; Bond, Alexander L.; Sardana, Aniket; Glass, Trevor	RAPID POPULATION ESTIMATE OF A SURFACE-NESTING SEABIRD ON A REMOTE ISLAND USING A LOW-COST UNMANNED AERIAL VEHICLE	MARINE ORNITHOLOGY	Unmanned aerial vehicles (UAVs) offer a number of potential applications in wildlife monitoring, including the aerial surveying of seabird populations on remote islands. While UAVs may represent considerable improvements and/or cost savings over other survey techniques, such as ground searches or surveys via fixed-wing aircraft or helicopter, their use to date has been rare. The few studies that …	1018-3337	2074-1235	44	2	215	220
2016	Hodgson, JC; Baylis, SM; Mott, R; Herrod, A; Clarke, RH	Hodgson, Jarrod C.; Baylis, Shane M.; Mott, Rowan; Herrod, Ashley; Clarke, Rohan H.	Precision wildlife monitoring using unmanned aerial vehicles	SCIENTIFIC REPORTS	Unmanned aerial vehicles (UAVs) represent a new frontier in environmental research. Their use has the potential to revolutionise the field if they prove capable of improving data quality or the ease with which data are collected beyond traditional methods. We apply UAV technology to wildlife monitoring in tropical and polar environments and demonstrate that UAV-derived counts of colony nesting bi…	2045-2322		6				22574	10.1038/srep22574
2016	Morellato, LPC; Alberton, B; Alvarado, ST; Borges, B; Buisson, E; Camargo, MGG; Cancian, LF; Carstensen, DW; Escobar, DFE; Leite, PTP; Mendoza, I; Rocha, NMWB; Soares, NC; Silva, TSF; Staggemeier, VG; Streher, AS; Vargas, BC; Peres, CA	Cerdeira Morellato, Leonor Patricia; Alberton, Bruna; Alvarado, Swanni T.; Borges, Bruno; Buisson, Elise; Camargo, Maria Gabriela G.; Cancian, Leonardo F.; Carstensen, Daniel W.; Escobar, Diego F. E.; Leite, Patricia T. P.; Mendoza, Irene; Rocha, Nathalia M. W. B.; Soares, Natalia C.; Freire Silva, Thiago Sanna; Staggemeier, Vanessa G.; Streher, Annia Susin; Vargas, Betania C.; Peres, Carlos A.	Linking plant phenology to conservation biology	BIOLOGICAL CONSERVATION	Phenology has achieved a prominent position in current scenarios of global change research given its role in monitoring and predicting the timing of recurrent life cycle events. However, the implications of phenology to environmental conservation and management remain poorly explored. Here, we present the first explicit appraisal of how phenology a multidisciplinary science encompassing biometeor…	0006-3207	1873-2917	195		60	72		10.1016/j.biocon.2015.12.033
2016	Wich, S; Dellatore, D; Houghton, M; Ardi, R; Koh, LP	Wich, Serge; Dellatore, David; Houghton, Max; Ardi, Rio; Koh, Lian Pin	A preliminary assessment of using conservation drones for Sumatran orang-utan (Pongo abelii) distribution and density	JOURNAL OF UNMANNED VEHICLE SYSTEMS	To conserve biodiversity, scientists monitor wildlife populations and their habitats. Current methods have constraints, such as the costs of ground or aerial surveys, limited resolution of freely available satellite images, and expensive high-resolution satellite images. Recently researchers started to use unmanned aerial vehicles (UAVs or drones) for wildlife and habitat monitoring. Here we test…	2291-3467		4	1	45	52		10.1139/juvs-2015-0015
2016	Gulci, S; Akay, AE	Gulci, Sercan; Akay, Abdullah Emin	Using thermal infrared imagery produced by unmanned air vehicles to evaluate locations of ecological road structures	JOURNAL OF THE FACULTY OF FORESTRY-ISTANBUL UNIVERSITY	The aerial photos and satellite images are widely used and cost efficient data for monitoring and analysis of large areas in forestry activities. Nowadays, accurate and high resolution remote sensing data can be generated for large areas by using Unmanned Aerial Vehicles (UAV) integrated with sensors working in various spectral bands. Besides, the UAV systems (UAVs) have been used in interdiscipl…	0535-8418	1309-6257	66	2	698	709		10.17099/jffiu.76461
2016	Korczak-Abshire, M; Kidawa, A; Zmarz, A; Storvold, R; Karlsen, SR; Rodzewicz, M; Chwedorzewska, K; Znoj, A	Korczak-Abshire, M.; Kidawa, A.; Zmarz, A.; Storvold, R.; Karlsen, S. R.; Rodzewicz, M.; Chwedorzewska, K.; Znoj, A.	Preliminary study on nesting Adelie penguins disturbance by unmanned aerial vehicles	CCAMLR SCIENCE	The importance of unmanned aerial vehicles (UAVs) in remote sensing is rapidly growing. However, knowledge about their potential impact on wildlife is scant, especially in Antarctica, where they are a new tool used in ecological research and monitoring. In this preliminary study potential effects of wildlife disturbance by fixed-wing UAVs are investigated. In austral summer 2014/15, UAV overfligh…	1023-4063		23		1	16
2016	Gonzalez, LF; Montes, GA; Puig, E; Johnson, S; Mengersen, K; Gaston, KJ	Gonzalez, Luis F.; Montes, Glen A.; Puig, Eduard; Johnson, Sandra; Mengersen, Kerrie; Gaston, Kevin J.	Unmanned Aerial Vehicles (UAVs) and Artificial Intelligence Revolutionizing Wildlife Monitoring and Conservation	SENSORS	Surveying threatened and invasive species to obtain accurate population estimates is an important but challenging task that requires a considerable investment in time and resources. Estimates using existing ground-based monitoring techniques, such as camera traps and surveys performed on foot, are known to be resource intensive, potentially inaccurate and imprecise, and difficult to validate. Rec…	1424-8220		16	1			97	10.3390/s16010097
2015	Chabot, D; Bird, DM	Chabot, Dominique; Bird, David M.	Wildlife research and management methods in the 21st century: Where do unmanned aircraft fit in?	JOURNAL OF UNMANNED VEHICLE SYSTEMS	Since the turn of the century, emerging unmanned aircraft systems (UAS) have found increasingly diverse applications in wildlife science as convenient, very high-resolution remote sensing devices. Achieved or conceptualized applications include optical surveying and observation of animals, autonomous wildlife telemetry tracking, and habitat research and monitoring. As the technology continues to …	2291-3467		3	4	137	155		10.1139/juvs-2015-0021
2015	Drever, MC; Chabot, D; O'Hara, PD; Thomas, JD; Breault, A; Millikin, RL	Drever, Mark C.; Chabot, Dominique; O'Hara, Patrick D.; Thomas, Jeffrey D.; Breault, Andre; Millikin, Rhonda L.	Evaluation of an unmanned rotorcraft to monitor wintering waterbirds and coastal habitats in British Columbia, Canada	JOURNAL OF UNMANNED VEHICLE SYSTEMS	The effective protection of coastal and estuarine habitats requires reliable monitoring information on their use by waterbirds, and the use of small unmanned aircraft systems (UAS) may provide access to these habitats without disturbing birds. We evaluated the use of a rotary-wing UAS with a high-end consumer camera to identify and count wintering waterbirds at two coastal sites in British Columb…	2291-3467		3	4	259	267		10.1139/juvs-2015-0019
2015	Mulero-Pazmany, M; Barasona, JA; Acevedo, P; Vicente, J; Negro, JJ	Mulero-Pazmany, Margarita; Angel Barasona, Jose; Acevedo, Pelayo; Vicente, Joaquin; Jose Negro, Juan	Unmanned Aircraft Systems complement biologging in spatial ecology studies	ECOLOGY AND EVOLUTION	The knowledge about the spatial ecology and distribution of organisms is important for both basic and applied science. Biologging is one of the most popular methods for obtaining information about spatial distribution of animals, but requires capturing the animals and is often limited by costs and data retrieval. Unmanned Aircraft Systems (UAS) have proven their efficacy for wildlife surveillance…	2045-7758		5	21	4808	4818		10.1002/ece3.1744
2015	Verissimo, D; Campbell, B	Verissimo, Diogo; Campbell, Brian	Understanding stakeholder conflict between conservation and hunting in Malta	BIOLOGICAL CONSERVATION	Conservation conflicts often involve tensions between human stakeholders. One highly topical conflict is that around migratory bird hunting in the Mediterranean, particularly in Malta. Here, tensions between hunters and anti-hunting groups have escalated to include rural surveillance operations by anti-hunting groups, physical scuffles with hunters, retaliatory poaching and measures unheard of in…	0006-3207	1873-2917	191		812	818		10.1016/j.biocon.2015.07.018
2015	Van Andel, AC; Wich, SA; Boesch, C; Koh, LP; Robbins, MM; Kelly, J; Kuehl, HS	Van Andel, Alexander C.; Wich, Serge A.; Boesch, Christophe; Koh, Lian Pin; Robbins, Martha M.; Kelly, Joseph; Kuehl, Hjalmar S.	Locating Chimpanzee Nests and Identifying Fruiting Trees With an Unmanned Aerial Vehicle	AMERICAN JOURNAL OF PRIMATOLOGY	Monitoring of animal populations is essential for conservation management. Various techniques are available to assess spatiotemporal patterns of species distribution and abundance. Nest surveys are often used for monitoring great apes. Quickly developing technologies, including unmanned aerial vehicles (UAVs) can be used to complement these ground-based surveys, especially for covering large area…	0275-2565	1098-2345	77	10	1122	1134		10.1002/ajp.22446
2015	Linchant, J; Lisein, J; Semeki, J; Lejeune, P; Vermeulen, C	Linchant, Julie; Lisein, Jonathan; Semeki, Jean; Lejeune, Philippe; Vermeulen, Cedric	Are unmanned aircraft systems (UASs) the future of wildlife monitoring? A review of accomplishments and challenges	MAMMAL REVIEW	1. Regular monitoring of animal populations must be established to ensure wildlife protection, especially when pressure on animals is high. The recent development of drones or unmanned aircraft systems (UASs) opens new opportunities. UASs have several advantages, including providing data at high spatial and temporal resolution, providing systematic, permanent data, having low operational costs an…	0305-1838	1365-2907	45	4	239	252		10.1111/mam.12046
2015	He, KS; Bradley, BA; Cord, AF; Rocchini, D; Tuanmu, MN; Schmidtlein, S; Turner, W; Wegmann, M; Pettorelli, N	He, Kate S.; Bradley, Bethany A.; Cord, Anna F.; Rocchini, Duccio; Tuanmu, Mao-Ning; Schmidtlein, Sebastian; Turner, Woody; Wegmann, Martin; Pettorelli, Nathalie	Will remote sensing shape the next generation of species distribution models?	REMOTE SENSING IN ECOLOGY AND CONSERVATION	Two prominent limitations of species distribution models (SDMs) are spatial biases in existing occurrence data and a lack of spatially explicit predictor variables to fully capture habitat characteristics of species. Can existing and emerging remote sensing technologies meet these challenges and improve future SDMs? We believe so. Novel products derived from multispectral and hyperspectral sensor…	2056-3485		1	1	4	18		10.1002/rse2.7
2015	Dulava, S; Bean, WT; Richmond, OMW	Dulava, Sharon; Bean, William T.; Richmond, Orien M. W.	Applications of Unmanned Aircraft Systems (UAS) for Waterbird Surveys	ENVIRONMENTAL PRACTICE	Utilizing unmanned aircraft systems (UAS) can be an efficient and repeatable means of surveying wildlife, especially waterbirds. As with any technology in its infancy, case studies offer opportunities to explore drawbacks and limitations, both anticipated and unanticipated. We examined the relationship between flight altitude and camera focal length on bird identification. We then conducted a pos…	1466-0466	1466-0474	17	3	201	210		10.1017/S1466046615000186
2015	Pomeroy, P; O'Connor, L; Davies, P	Pomeroy, P.; O'Connor, L.; Davies, P.	Assessing use of and reaction to unmanned aerial systems in gray and harbor seals during breeding and molt in the UK	JOURNAL OF UNMANNED VEHICLE SYSTEMS	Wildlife biology applications of unmanned aerial systems (UAS) are extensive. Survey, identification, and measurement using UAS equipped with appropriate sensors can now be added to the suite of techniques available for monitoring animals - here we detail our experiences in using UAS to obtain detailed information from groups of seals, which can be difficult to observe from land. Trial flights to…	2291-3467		3	3	102	113		10.1139/juvs-2015-0013
2015	Ditmer, MA; Vincent, JB; Werden, LK; Tanner, JC; Laske, TG; Iaizzo, PA; Garshelis, DL; Fieberg, JR	Ditmer, Mark A.; Vincent, John B.; Werden, Leland K.; Tanner, Jessie C.; Laske, Timothy G.; Iaizzo, Paul A.; Garshelis, David L.; Fieberg, John R.	Bears Show a Physiological but Limited Behavioral Response to Unmanned Aerial Vehicles	CURRENT BIOLOGY	Unmanned aerial vehicles (UAVs) have the potential to revolutionize the way research is conducted in many scientific fields [1, 2]. UAVs can access remote or difficult terrain [3], collect large amounts of data for lower cost than traditional aerial methods, and facilitate observations of species that are wary of human presence [4]. Currently, despite large regulatory hurdles [5], UAVs are being …	0960-9822	1879-0445	25	17	2278	2283		10.1016/j.cub.2015.07.024
2015	Evans, LJ; Jones, TH; Pang, K; Evans, MN; Saimin, S; Goossens, B	Evans, Luke J.; Jones, T. Hefin; Pang, Keeyen; Evans, Meaghan N.; Saimin, Silvester; Goossens, Benoit	USE OF DRONE TECHNOLOGY AS A TOOL FOR BEHAVIORAL RESEARCH: A CASE STUDY OF CROCODILIAN NESTING	HERPETOLOGICAL CONSERVATION AND BIOLOGY	Detecting cryptic behaviors without influencing the animal being observed is a challenging aspect of behavioral ecology. Such behaviors, often demonstrating habitat use, can play a crucial role in understanding wildlife monitoring and conservation. Crocodilian nesting is one such activity. Unmanned Aerial Vehicles (UAVs), or drones, are auto-piloted aircraft that can be used to map areas aerially…	2151-0733	1931-7603	10	1	90	98
2015	Vas, E; Lescroel, A; Duriez, O; Boguszewski, G; Gremillet, D	Vas, Elisabeth; Lescroel, Amelie; Duriez, Olivier; Boguszewski, Guillaume; Gremillet, David	Approaching birds with drones: first experiments and ethical guidelines	BIOLOGY LETTERS	Unmanned aerial vehicles, commonly called drones, are being increasingly used in ecological research, in particular to approach sensitive wildlife in inaccessible areas. Impact studies leading to recommendations for best practices are urgently needed. We tested the impact of drone colour, speed and flight angle on the behavioural responses of mallards Anas platyrhynchos in a semi-captive situatio…	1744-9561	1744-957X	11	2			20140754	10.1098/rsbl.2014.0754
2013	Hodgson, A; Kelly, N; Peel, D	Hodgson, Amanda; Kelly, Natalie; Peel, David	Unmanned Aerial Vehicles (UAVs) for Surveying Marine Fauna: A Dugong Case Study	PLOS ONE	Aerial surveys of marine mammals are routinely conducted to assess and monitor species' habitat use and population status. In Australia, dugongs (Dugong dugon) are regularly surveyed and long-term datasets have formed the basis for defining habitat of high conservation value and risk assessments of human impacts. Unmanned aerial vehicles (UAVs) may facilitate more accurate, human-risk free, and c…	1932-6203		8	11			e79556	10.1371/journal.pone.0079556
2013	Vermeulen, C; Lejeune, P; Lisein, J; Sawadogo, P; Bouche, P	Vermeulen, Cedric; Lejeune, Philippe; Lisein, Jonathan; Sawadogo, Prosper; Bouche, Philippe	Unmanned Aerial Survey of Elephants	PLOS ONE	The use of a UAS (Unmanned Aircraft System) was tested to survey large mammals in the Nazinga Game Ranch in the south of Burkina Faso. The Gatewing x 100 (TM) equipped with a Ricoh GR III camera was used to test animal reaction as the UAS passed, and visibility on the images. No reaction was recorded as the UAS passed at a height of 100 m. Observations, made on a set of more than 7000 images, rev…	1932-6203		8	2			e54700	10.1371/journal.pone.0054700
2013	Lisein, J; Linchant, J; Lejeune, P; Bouche, P; Vermeulen, C	Lisein, Jonathan; Linchant, Julie; Lejeune, Philippe; Bouche, Philippe; Vermeulen, Cedric	Aerial surveys using an Unmanned Aerial System (UAS): comparison of different methods for estimating the surface area of sampling strips	TROPICAL CONSERVATION SCIENCE	Conservation of natural ecosystems requires regular monitoring of biodiversity, including the estimation of wildlife density. Recently, unmanned aerial systems (UAS) have become more available for numerous civilian applications. The use of small drones for wildlife surveys as a surrogate for manned aerial surveys is becoming increasingly attractive and has already been implemented with some succe…	1940-0829		6	4	506	520		10.1177/194008291300600405
2012	Rodriguez, A; Negro, JJ; Mulero, M; Rodriguez, C; Hernandez-Pliego, J; Bustamante, J	Rodriguez, Airam; Negro, Juan J.; Mulero, Mara; Rodriguez, Carlos; Hernandez-Pliego, Jesus; Bustamante, Javier	The Eye in the Sky: Combined Use of Unmanned Aerial Systems and GPS Data Loggers for Ecological Research and Conservation of Small Birds	PLOS ONE	Technological advances for wildlife monitoring have expanded our ability to study behavior and space use of many species. But biotelemetry is limited by size, weight, data memory and battery power of the attached devices, especially in animals with light body masses, such as the majority of bird species. In this study, we describe the combined use of GPS data logger information obtained from free…	1932-6203		7	12			e50336	10.1371/journal.pone.0050336
2012	Martin, J; Edwards, HH; Burgess, MA; Percival, HF; Fagan, DE; Gardner, BE; Ortega-Ortiz, JG; Ifju, PG; Evers, BS; Rambo, TJ	Martin, Julien; Edwards, Holly H.; Burgess, Matthew A.; Percival, H. Franklin; Fagan, Daniel E.; Gardner, Beth E.; Ortega-Ortiz, Joel G.; Ifju, Peter G.; Evers, Brandon S.; Rambo, Thomas J.	Estimating Distribution of Hidden Objects with Drones: From Tennis Balls to Manatees	PLOS ONE	Unmanned aerial vehicles (UAV), or drones, have been used widely in military applications, but more recently civilian applications have emerged (e. g., wildlife population monitoring, traffic monitoring, law enforcement, oil and gas pipeline threat detection). UAV can have several advantages over manned aircraft for wildlife surveys, including reduced ecological footprint, increased safety, and t…	1932-6203		7	6			e38882	10.1371/journal.pone.0038882
2012	Sarda-Palomera, F; Bota, G; Vinolo, C; Pallares, O; Sazatornil, V; Brotons, L; Gomariz, S; Sarda, F	Sarda-Palomera, Francesc; Bota, Gerard; Vinolo, Carlos; Pallares, Oriol; Sazatornil, Victor; Brotons, Lluis; Gomariz, Spartacus; Sarda, Francesc	Fine-scale bird monitoring from light unmanned aircraft systems	IBIS	Unmanned aircraft systems (UAS) are remote-controlled devices capable of collecting information from difficult-to-access places while minimizing disturbance. Although UAS are increasingly used in many research disciplines, their application to wildlife research remains to be explored in depth. Here, we report on the use of a small UAS to monitor temporal changes in breeding population size in a B…	0019-1019	1474-919X	154	1	177	183		10.1111/j.1474-919X.2011.01177.x
2012	Koh, LP; Wich, SA	Koh, Lian Pin; Wich, Serge A.	Dawn of drone ecology: low-cost autonomous aerial vehicles for conservation	TROPICAL CONSERVATION SCIENCE	Tropical deforestation continues to be a major driver of biodiversity loss and greenhouse gas emissions. Remote sensing technology is increasingly used to assess changes in forest cover, species distributions and carbon stocks. However, satellite and airborne sensors can be prohibitively costly and inaccessible for researchers in developing countries. Here, we describe the development and use of …	1940-0829		5	2	121	132		10.1177/194008291200500202
2011	Rango, A; Havstad, K; Estell, R	Rango, Albert; Havstad, Kris; Estell, Rick	The Utilization of Historical Data and Geospatial Technology Advances at the Jornada Experimental Range to Support Western America Ranching Culture	REMOTE SENSING	By the early 1900s, concerns were expressed by ranchers, academicians, and federal scientists that widespread overgrazing and invasion of native grassland by woody shrubs were having severe negative impacts upon normal grazing practices in Western America. Ranchers wanted to reverse these trends and continue their way of life and were willing to work with scientists to achieve these goals. One re…		2072-4292	3	9	2089	2109		10.3390/rs3092089
2011	Cress, JJ; Sloan, JL; Hutt, ME	Cress, Jill J.; Sloan, Jeff L.; Hutt, Michael E.	Implementation of unmanned aircraft systems by the US Geological Survey	GEOCARTO INTERNATIONAL	The U.S. Geological Survey (USGS) Unmanned Aircraft Systems (UAS) Project Office is leading the implementation of UAS technology in anticipation of transforming the research methods and management techniques employed across the Department of the Interior. UAS technology is being made available to monitor environmental conditions, analyse the impacts of climate change, respond to natural hazards, …	1010-6049		26	2	133	140		10.1080/10106049.2010.533199
2011	Breckenridge, RP; Dakins, ME	Breckenridge, Robert P.; Dakins, Maxine E.	Evaluation of Bare Ground on Rangelands Using Unmanned Aerial Vehicles: A Case Study	GISCIENCE & REMOTE SENSING	Attention is currently being given to methods that assess the ecological condition of rangelands throughout the United States. Bare ground is being considered by a number of agencies and resource specialists as a key indicator that can be evaluated over a broad area. Traditional methods of measuring bare ground rely on field technicians collecting data along a line transect or from a plot. Unmann…	1548-1603		48	1	74	85		10.2747/1548-1603.48.1.74
2010	Watts, AC; Perry, JH; Smith, SE; Burgess, MA; Wilkinson, BE; Szantoi, Z; Ifju, PG; Percival, HF	Watts, Adam C.; Perry, John H.; Smith, Scot E.; Burgess, Matthew A.; Wilkinson, Benjamin E.; Szantoi, Zoltan; Ifju, Peter G.; Percival, H. Franklin	Small Unmanned Aircraft Systems for Low-Altitude Aerial Surveys	JOURNAL OF WILDLIFE MANAGEMENT	Unmanned aircraft systems (UASs) are proposed as a useful alternative to manned aircraft for some aerial wildlife surveys. We described the components and current capabilities of a small UAS developed specifically for wildlife and ecological surveys that is currently in field use for a variety of applications. We also reviewed government regulations currently affecting the use of UASs in civilian…	0022-541X	1937-2817	74	7	1614	1619		10.2193/2009-425
2006	Beard, RW; McLain, TW; Nelson, DB; Kingston, D; Johanson, D	Beard, Randal W.; McLain, Timothy W.; Nelson, Derek B.; Kingston, Derek; Johanson, David	Decentralized cooperative aerial-surveillance using fixed-wing miniature UAVs	PROCEEDINGS OF THE IEEE	Numerous applications require aerial surveillance. Civilian applications include Monitoring forest fires, oil fields, and pipelines and tracking wildlife. Applications to homeland security include border. patrol and monitoring the perimeter of nuclear power plants. Military applications are numerous. The current approach to these applications is to use a single manned vehicle for surveillance. Ho…	0018-9219	1558-2256	94	7	1306	1324		10.1109/JPROC.2006.876930
2002	Schawe, D; Rohardt, CH; Wichmann, G	Schawe, D; Rohardt, CH; Wichmann, G	Aerodynamic design assessment of Strato 2C and its potential for unmanned high altitude airborne platforms	AEROSPACE SCIENCE AND TECHNOLOGY	Currently, there is a large interest worldwide in the development of High Altitude Long Endurance (HALE) Unmanned Aerial Vehicles (UAVs) for a number of civil and military missions, such as routine weather reconnaissance, surface reconnaissance (forest fires, etc.), earth observation, border patrol and monitoring, fisheries and wildlife refuge management, chemical and biological agent detection, …	1270-9638		6	1	43	51	PII S1270-9638(01)01127-0	10.1016/S1270-9638(01)01127-0
2000	Aimond, F; Beck, L; Gautier, P; Cherif, OK; Davy, JM; Lorente, P; Nisato, D; Vassort, G	Aimond, F; Beck, L; Gautier, P; Cherif, OK; Davy, JM; Lorente, P; Nisato, D; Vassort, G	Cellular and in vivo electrophysiological effects of dronedarone in normal and postmyocardial infarcted rats	JOURNAL OF PHARMACOLOGY AND EXPERIMENTAL THERAPEUTICS	We studied the effects of dronedarone (SR 33589) on the action potentials, membrane ionic currents, and arrhythmic activity in control rats and in rats after myocardial infarction, a model known to develop anomalous electrical activity. Dronedarone increased action potential duration in normal hearts. It had little effect on the action potentials that were already prolonged in the postmyocardial …	0022-3565	1521-0103	292	1	415	424

## Sheet: Selected 121 articles
Reference	Latitude	Longitude	Taxa	Species detail	Monitoring purpose	Journal	Title	Web of Science	Missing topics	Recommending keywords
Afán et al. (2018)	37.0731	6.04611	Bird	Glossy ibis	Individual detection and population survey	DRONES	Drone Monitoring of Breeding Waterbird Populations: The Case of the Glossy Ibis	N	animal	taxa/species
Aniceto et al. (2018)	69.7712	18.6697	Marine mammal	Humpback whale, Killer whale, Harbor porpoise	Individual detection and population survey	ECOSPHERE	Monitoring marine mammals using unmanned aerial vehicles: quantifying detection certainty	Y
Apprill et al. (2017)	42.17	-70.205	Marine mammal	Humpback whale	Individual detection and population survey	MSYSTEMS	Extensive Core Microbiome in Drone-Captured Whale Blow Supports a Framework for Health Monitoring	Y
Bakó et al. (2014)	47.2236	18.6492	Bird	White Stork, Graylag Goose, Great Egret, Gray Heron, Great Cormorant, Mallard, Black-headed Gull	Individual detection and population survey	SENSORS	Introduction and Testing of a Monitoring and Colony-Mapping Method for Waterbird Populations That Uses High-Speed and Ultra-Detailed Aerial Remote Sensing	N	UA/UAV, RPA/RPAS	remote sensing
Barnas et al. (2018)	58.7551	-93.2939	Marine mammal	Polar Bear	Behavioral study	POLAR BIOLOGY	A pilot(less) study on the use of an unmanned aircraft system for studying polar bears (Ursus maritimus)	N	animal, monitoring	taxa/species, remote sensing, behavior/disturbance
Barnas et al. (2018)	58.7254	-93.4643	Bird	Lesser Snow Geese	Behavioral study	ECOLOGY AND EVOLUTION	Evaluating behavioral responses of nesting lesser snow geese to unmanned aircraft surveys	Y
Bech-Hansen et al. (2020)			Bird	Barnacle Goose, Pink-footed Goose, Greylag Goose, Canada Goose, Greater White-fronted Goose	Behavioral study	BIRD CONSERVATION INTERNATIONAL	Evaluation of disturbance effect on geese caused by an approaching unmanned aerial vehicle	Y
Beranek et al. (2020)	-32.701	151.809	Terrestrial mammal	Koala	Individual detection and population survey	AUSTRALIAN MAMMALOGY	Trialling a real-time drone detection and validation protocol for the koala (Phascolarctos cinereus)	Y
Bevan et al. (2015)	23.2186	-97.6983	Reptile	Kemp’s ridley turtle	Individual detection and population survey	MARINE TURTLE NEWSLETTER	Unmanned Aerial Vehicles (UAVs) for Monitoring Sea Turtles in Near-Shore Waters	N	animal	taxa/species
Bevan et al. (2016)	23.2186	-97.6983	Reptile	Green Turtle	Behavioral study	HERPETOLOGICAL REVIEW	Using unmanned aerial vehicle (UAV) technology for locating, identifying, and monitoring courtship and mating behaviour in the green turtle (Chelonia mydas)	N	animal	taxa/species
Bevan et al. (2018)	-15.5408	24.4106	Bird, Reptile	Crested tern, Green turtles, Flatback turtles, Hawksbill turtles, Saltwater crocodiles	Behavioral study	PLOS ONE	Measuring behavioral responses of sea turtles, saltwater crocodiles, and crested terns to drone disturbance to define ethical operating thresholds	N	monitoring	conservation
Biserkov and Lukanov (2017)	42.6679	23.3074	Reptile	Red-ear Slider, European Pond Turtles	Individual detection and population survey	ACTA ZOOLOGICA BULGARIA	Unmanned Aerial Vehicles (UAVs) for Surveying Freshwater Turtle Populations: Methodology Adjustment	Y
Blight et al. (2019)	48.42	-123.36	Bird	Glaucous-winged Gull	Individual detection and population survey	JOURNAL OF UNMANNED VEHICLE SYSTEMS	Evaluating UAV-based techniques to census an urban-nesting gull population on Canada's Pacific coast	Y
Brisson-Curadeau et al. (2017)	62.9478	-82.0177	Bird	Thick-billed murre, Glaucous gull, Common murre, Iceland gull	Behavioral study	SCIENTIFIC REPORTS	Seabird species vary in behavioural response to drone census	N	animal, monitoring	behavior/disturbance
Brooke et al. (2015)	23.8696	-166.285	Marine mammal, Bird, Reptile	Hawaiian monk seal, Black-footed albatross, Laysan albatross, Great frigatebird, Red-footed booby, Green sea turtle	Individual detection and population survey	JOURNAL OF UNMANNED VEHICLE SYSTEMS	Testing marine conservation applications of unmanned aerial systems (UAS) in a remote marine protected area	N	animal	taxa/species
Burke et al. (2019)	-31.4764	22.3541	Terrestrial mammal	Riverine rabbit	Individual detection and population survey	INTERNATIONAL JOURNAL OF REMOTE SENSING	Optimizing observing strategies for monitoring animals using drone-mounted thermal infrared cameras	Y
Bushaw et al. (2020)	50.43	-100.59	Bird	Canvasback, Redhead, Ring‐necked Duck, Lesser Scaup, Ruddy Duck, Mallard	Individual detection and population survey	JOURNAL OF FIELD ORNITHOLOGY	Applications of an unmanned aerial vehicle and thermal‐imaging camera to study ducks nesting over water	Y
Centelleghe et al. (2020)	38.47	15.61	Marine mammal	Bottlenose dolphin, Sperm whale	Individual detection and population survey	PLOS ONE	The use of Unmanned Aerial Vehicles (UAVs) to sample the blow microbiome of small cetaceans	N	monitoring	sample
Chabot and Bird (2012)	45.4118	-73.9436	Bird	Canada Geese, Snow Geese	Individual detection and population survey	WATERBIRDS	Evaluation of an off-the-shelf Unmanned Aircraft System for Surveying Flocks of Geese	N	animal, monitoring	taxa/species, detect/count, remote sensing
Chabot et al. (2015)	46.7791	-64.8759	Bird	Common Tern	Behavioral study	PLOS ONE	Population Census of a Large Common Tern Colony with a Small Unmanned Aircraft	N	animal, monitoring	taxa/species, detect/count
Christiansen et al. (2016)	-22.0184	114.171	Marine mammal	Humpback whale	Individual detection and population survey	ECOSPHERE	Noninvasive unmanned aerial vehicle provides estimates of the energetic cost of reproduction in humpback whales	N	monitoring	aerial photograph
Christiansen et al. (2020)	-31.4838	131.101	Marine mammal	Southern right whale	Behavioral study	MARINE MAMMAL SCIENCE	Southern right whales show no behavioral response to low noise levels from a nearby unmanned aerial vehicle	Y
Christiansen et al. (2020)	-34.3414	115.188	Marine mammal	Humpback whale	Individual detection and population survey	JOURNAL OF EXPERIMENTAL BIOLOGY	Variation in outer blubber lipid concentration does not reflect morphological body condition in humpback whales	Y
Clarke et al. (2019)	50.6796	-2.0238	Bird	Eurasian oystercatcher, Eurasian curlew, Black-tailed godwit, Common redshank, Common shelduck	Individual detection and population survey	ECOLOGICAL INFORMATICS	Using remote sensing to quantify fishing effort and predict shorebird conflicts in an intertidal fishery	Y
Cukor et al. (2019)	50.0978	13.815	Terrestrial mammal	Roe deer	Individual detection and population survey	PEERJ	Use of aerial thermography to reduce mortality of roe deer fawns before harvest	Y
Ditmer et al. (2015)	46.9487	-93.2808	Terrestrial mammal	American Black Bears	Behavioral study	CURRENT BIOLOGY	Bears Show a Physiological but Limited Behavioral Response to Unmanned Aerial Vehicles	Y
Durban et al. (2015)	49.3818	-126.41	Marine mammal	Killer whale	Individual detection and population survey	JOURNAL OF UNMANNED VEHICLE SYSTEMS	Photogrammetry of killer whales using a small hexacopter launched at sea	N	animal, monitoring	taxa/species, photogrammetry
Durban et al. (2016)	-42.9878	-72.9181	Marine mammal	Blue whale	Individual detection and population survey	MARINE MAMMAL SCIENCE	Photogrammetry of blue whales with an unmanned hexacopter	N	animal, monitoring	taxa/species, photogrammetry
Elsey and Trosclair (2016)	29.7135	-92.8245	Reptile	American Alligator	Individual detection and population survey	SOUTHEASTERN NATURALIST	The Use of an Unmanned Aerial Vehicle to Locate Alligator Nests	N	animal, monitoring	taxa/species, detect
Evans et al. (2015)	5.42374	118.056	Reptile	Estuarine Crocodiles	Individual detection and population survey	HERPETOLOGICAL CONSERVATION AND BIOLOGY	Use of Drone Technology as a Tool for Behavioral Research: A Case Study of Crocodilian Nesting	Y
Ezat et al. (2018)	-26.894	32.2926	Reptile	Nile Crocodile	Individual detection and population survey	BIOLOGICAL CONSERVATION	Use of an unmanned aerial vehicle (drone) to survey Nile crocodile populations: A case study at Lake Nyamithi, Ndumo game reserve, South Africa	Y
Ferguson et al. (2018)	71.3834	-156.474	Marine mammal	Beluga, Bowhead whale, Gray whale	Individual detection and population survey	JOURNAL OF UNMANNED VEHICLE SYSTEMS	Performance of manned and unmanned aerial surveys to collect visual data and imagery for estimating arctic cetacean density and associated uncertainty	N	animal, monitoring	taxa/species, survey
Fettermann et al. (2019)	-36.1667	175.383	Marine mammal	Bottlenose dolphin	Behavioral study	SCIENTIFIC REPORTS	Behaviour reactions of bottlenose dolphins (Tursiops truncatus) to multirotor Unmanned Aerial Vehicles (UAVs)	N	monitoring	behavior/disturbance
Forbey et al. (2017)			Bird	Greater sage-grouse	Behavioral study	WILDLIFE BIOLOGY	Emerging technology to measure habitat quality and behavior of grouse: examples from studies of greater sage-grouse	Y
Fortune et al. (2017)	65.9365	-65.9264	Marine mammal	Bowhead whale	Behavioral study	PLOS ONE	Evidence of molting and the function of “rock-nosing” behavior in bowhead whales in the eastern Canadian Arctic	N	animal, monitoring	taxa/species, behavior
Francis et al. (2020)	-19.5414	22.8597	Bird	Yellow-billed Stork, African Openbill, Marabou Stork, Yellow-billed Egret, Great Egret, Pink-backed Pelican, Straw-necked Ibis, Australian White Ibis	Individual detection and population survey	REMOTE SENSING	Counting Mixed Breeding Aggregations of Animal Species Using Drones: Lessons from Waterbirds on Semi-Automation	Y
Frouin-Mouy et al. (2020)	26.7889	-113.244	Marine mammal	Gray whale	Individual detection and population survey	JOURNAL OF EXPERIMENTAL MARINE BIOLOGY AND ECOLOGY	Using two drones to simultaneously monitor visual and acoustic behaviour of gray whales (Eschrichtius robustus) in Baja California, Mexico	Y
Fu et al. (2018)	33.1334	-107.146	Terrestrial mammal	Brazilian free-tailed bat	Individual detection and population survey	METHODS IN ECOLOGY AND EVOLUTION	The Chirocopter: A UAV for recording sound and video of bats at altitude	N	animal, monitoring	taxa/species
Fudala and Bialik (2020)	-62.2353	-58.4715	Marine mammal	Southern elephant seal	Individual detection and population survey	REMOTE SENSING	Breeding Colony Dynamics of Southern Elephant Seals at Patelnia Point, King George Island, Antarctica	Y
Gentle et al. (2018)	-27.1997	147.515	Terrestrial mammal	Macropods	Individual detection and population survey	WILDLIFE RESEARCH	A comparison of unmanned aerial vehicles (drones) and manned helicopters for monitoring macropod populations	Y
Geoghegan et al. (2018)	-34.0821	151.245	Marine mammal	Humpback whale	Individual detection and population survey	VIRUSES	Virological Sampling of Inaccessible Wildlife with Drones	N	monitoring	sample
Giles et al. (2020)	-28.84	153.57	Marine mammal	Bottlenose dolphin	Behavioral study	AQUATIC CONSERVATION-MARINE AND FRESHWATER ECOSYSTEMS	Responses of bottlenose dolphins (Tursiopsspp.) to small drones	Y
Goebel et al. (2015)	-62.4583	-60.7881	Marine mammal, Bird	Leopard seal, Fur seal, Chinstrap penguin, Gentoo penguin	Individual detection and population survey	POLAR BIOLOGY	A small unmanned aerial system for estimating abundance and size of Antarctic predators	N	animal, monitoring	taxa/species, population
Gonzalez et al. (2016)	-26.8343	152.961	Terrestrial mammal	Koala	Individual detection and population survey	SENSORS	Unmanned Aerial Vehicles (UAVs) and Artificial Intelligence Revolutionizing Wildlife Monitoring and Conservation	Y
Gooday et al. (2018)	-42.2478	173.831	Marine mammal	New Zealand fur seal	Individual detection and population survey	JOURNAL OF UNMANNED VEHICLE SYSTEMS	An assessment of thermal-image acquisition with an unmanned aerial vehicle (UAV) for direct counts of coastal marine mammals ashore	N	animal, monitoring	taxa/species, survey
Gray et al. (2019)	9.99241	-85.7027	Reptile	Olive ridley turtles	Individual detection and population survey	METHODS IN ECOLOGY AND EVOLUTION	A convolutional neural network for detecting sea turtles in drone imagery	Y
Gray et al. (2019)			Marine mammal	Gray whale, Humpback whale, Minke whales	Individual detection and population survey	METHODS IN ECOLOGY AND EVOLUTION	Drones and convolutional neural networks facilitate automated and accurate cetacean species identification and photogrammetry	N	animal, monitoring	taxa/species, photogrammetry
Grenzdörffer (2013)	54.0292	11.4936	Bird	Common gull	Individual detection and population survey	ISPRS ARCHIVES	UAS-based automatic bird count of a common gull colony	N	animal, monitoring	taxa/species, detect/count
Groom et al. (2011)	-28.6728	24.7633	Bird	Lesser Flamingo	Individual detection and population survey	INTERNATIONAL JOURNAL OF REMOTE SENSING	Using object-based analysis of image data to count birds: mapping of Lesser Flamingos at Kamfers Dam, Northern Cape, South Africa	N	animal, monitoring	taxa/species, detect/count
Guo et al. (2018)	34.7379	97.884	Terrestrial mammal	Kiang, Tibetan gazelle, Blue sheep, Yak, Tibetan sheep	Individual detection and population survey	REMOTE SENSING	Application of UAV Remote Sensing for a Population Census of Large Wild Herbivores—Taking the Headwater Region of the Yellow River as an Example	N	monitoring	remote sensing
Hensel et al. (2018)	26.4481	-77.0563	Reptile, Fish	Hawksbill, Green turtle, Lemon shark, Nurse shark, Bonnethead shark, Southern stingray, Spotted eagle ray	Individual detection and population survey	LATIN AMERICAN JOURNAL OF AQUATIC RESEARCH	Using a small, consumer-grade drone to identify and count marine megafauna in shallow habitats	Y
Hodgson et al. (2013)	-25.5	113.5	Marine mammal	Dugong	Individual detection and population survey	PLOS ONE	Unmanned Aerial Vehicles (UAVs) for Surveying Marine Fauna: A Dugong Case Study	Y
Hodgson et al. (2016)	-12.2667	123.033	Bird	Lesser Frigatebird, Crested tern, Royal penguin	Individual detection and population survey	SCIENTIFIC REPORTS	Precision wildlife monitoring using unmanned aerial vehicles	Y
Hodgson et al. (2020)	-32.72	133.97	Marine mammal	Australian sea lion	Individual detection and population survey	BIOLOGICAL CONSERVATION	Rapid condition monitoring of an endangered marine vertebrate using precise, non-invasive morphometrics	Y
Hong et al. (2019)	37.3039	126.658	Bird	Spot-billed duck, Green-winged teal, Great egrets, Grey heron	Individual detection and population survey	SENSORS	Application of Deep-Learning Methods to Bird Detection Using Unmanned Aerial Vehicle Imagery	Y
Horton et al. (2019)	-21.1983	-159.764	Marine mammal	Humpback whale	Individual detection and population survey	FRONTIERS IN MARINE SCIENCE	Doctor Drone: Non-invasive Measurement of Humpback Whale Vital Signs Using Unoccupied Aerial System Infrared Thermography	Y
Inoue et al. (2019)	41.8	-8.7	Terrestrial mammal	Feral horse	Behavioral study	ETHOLOGY	Lateral position preference in grazing feral horses	Y
Ireland et al. (2019)	40.6308	-74.8672	Terrestrial mammal	White-tailed deer	Individual detection and population survey	WILDLIFE SOCIETY BULLETIN	Testing unmanned aerial systems for monitoring wildlife at night	Y
Jech et al. (2020)	42.1352	-70.0174	Fish	Atlantic bluefin tuna	Individual detection and population survey	JOURNAL OF UNMANNED VEHICLE SYSTEMS	Measurements of juvenile Atlantic bluefin tuna (Thunnus thynnus) size using an unmanned aerial system	Y
Johnston et al. (2017)	41.3373	-70.306	Marine mammal	Gray Seal	Individual detection and population survey	JOURNAL OF UNMANNED VEHICLE SYSTEMS	Comparing occupied and unoccupied aircraft surveys of wildlife populations: assessing the gray seal (Halichoerus grypus) breeding colony on Muskeget Island, USA	N	monitoring	survey
Jones IV et al. (2005)	27.8601	-80.7251	Marine mammal, Bird	Manatee, White ibis, Egret, Wood stork	Individual detection and population survey	WILDLIFE SOCIETY BULLETIN	An Assessment of Small Unmanned Aerial Vehicles for Wildlife Research	N	monitoring	survey
Junda et al. (2015)	50.7339	-107.971	Bird	Bald Eagle, Ferruginous and Red-tailed Hawk, Osprey	Individual detection and population survey	JOURNAL OF UNMANNED VEHICLE SYSTEMS	Proper flight technique for using a small rotary-winged drone aircraft to safely, quickly, and accurately survey raptor nests	N	animal	taxa/species
Kiszka et al. (2016)	-17.553	-149.782	Fish	Blacktip reef shark, Pink whipray	Individual detection and population survey	MARINE ECOLOGY PROGRESS SERIES	Using unmanned aerial vehicles (UAVs) to investigate shark and ray densities in a shallow coral lagoon	N	monitoring	survey
Kloepper and Kinniry (2018)			Terrestrial mammal	Brazilian free-tailed bat	Individual detection and population survey	SCIENTIFIC REPORTS	Recording animal vocalizations from a UAV: bat echolocation during roost re-entry	Y
Koh and Wich (2012)	3.96932	98.0891	Terrestrial mammal	Sumatran orangutan, Sumatran elephant	Individual detection and population survey	TROPICAL CONSERVATION SCIENCE	Dawn of drone ecology: low-cost autonomous aerial vehicles for conservation	Y
Korczak-Abshire et al. (2016)	-62.1636	-58.4649	Bird	Adelié penguin	Behavioral study	CCAMLR SCIENCE	Preliminary study on nesting Adélie penguins disturbance by unmanned aerial vehicles	Y
Korczak-Abshire et al. (2019)	-62.1	-57.9333	Marine mammal	Southern Elephant Seal, Weddell Seal, Adelie Penguin, Antarctic Shag, Southern Giant Petrel, Chinstrap Penguin	Individual detection and population survey	POLAR BIOLOGY	Study of fauna population changes on Penguin Island and Turret Point Oasis (King George Island, Antarctica) using an unmanned aerial vehicle	N	animal, monitoring	taxa/species, remote sensing
Koski et al. (2015)	69.3725	-81.8247	Marine mammal	Bowhead Whale	Individual detection and population survey	JOURNAL OF UNMANNED VEHICLE SYSTEMS	Evaluation of UAS for photographic re-identification of bowhead whales, Balaena mysticetus	N	monitoring	survey
Krause et al. (2017)	-62.47	-60.77	Marine mammal	Leopard seal	Individual detection and population survey	PLOS ONE	An accurate and adaptable photogrammetric approach for estimating the mass and body condition of pinnipeds using an unmanned aerial system	Y
Kudo et al. (2012)	41.7661	140.609	Fish	Chum Salmon	Individual detection and population survey	FISHERIES RESEARCH	Cost-effective accurate estimates of adult chum salmon, Oncorhynchus keta, abundance in a Japanese river using a radio-controlled helicopter	N	animal, monitoring	taxa/species, aerial photograph
Lachman et al. (2020)	44.6038	-116.074	Bird	Western grebe	Individual detection and population survey	WETLANDS ECOLOGY AND MANAGEMENT	Drones provide a better method to find nests and estimate nest survival for colonial waterbirds: a demonstration with Western Grebes	Y
Laguna et al. (2017)	37.15	-6.515	Terrestrial mammal	Wild boar, Red deer, Fallow deer	Individual detection and population survey	ECOLOGICAL INDICATORS	The relevance of host overcrowding in wildlife epidemiology: A new spatially explicit aggregation index	Y
Landeo-Yauri et al. (2020)	17.5545	-88.0769	Marine mammal	Antillean manatee	Individual detection and population survey	ENDANGERED SPECIES RESEARCH	Using small drones to photo-identify Antillean manatees: a novel method for monitoring an endangered marine mammal in the Caribbean Sea	N	animal	taxa/species
Lee et al. (2019)	82.7933	-42.2283	Bird	Pink-footed goose, Common ringed plover, Black-faced spoonbill	Individual detection and population survey	PLOS ONE	Detection of two Arctic birds in Greenland and an endangered bird in Korea using RGB and thermal cameras with an unmanned aerial vehicle (UAV)	Y
Linchant et al. (2018)	3.76599	29.5144	Terrestrial mammal	Hippopotamus	Individual detection and population survey	PLOS ONE	UAS imagery reveals new survey opportunities for counting hippos	Y
Lyons et al. (2019)	-30.7268	147.634	Bird	Straw‐necked Ibis	Individual detection and population survey	METHODS IN ECOLOGY AND EVOLUTION	Monitoring large and complex wildlife aggregations with drones	Y
McClellend et al. (2016)	-37.3084	-12.6891	Bird	Tristan Albatross	Individual detection and population survey	MARINE ORNITHOLOGY	Rapid population estimate of a surface-nesting seabird on a remote island using a low-cost unmanned aerial vehicle	Y
McEvoy et al. (2016)	-33.3138	146.383	Bird	Black Winged Stilt, Pink-eared Duck, Grey Teal, Pacific Black Duck, Grebe, Hard Head, Welcome Swallow, Eurasian Coot	Behavioral study	PEERJ	Evaluation of unmanned aerial vehicle shape, flight path and camera type for waterfowl surveys: disturbance effects and species recognition	N	monitoring	behavior/disturbance
McIntosh et al. (2018)	-38.5262	145.1	Marine mammal, Bird	Australian fur seal, Peregrine falcon, Silver gull	Individual detection and population survey	FRONTIERS IN MARINE SCIENCE	Looking Without Landing-Using Remote Piloted Aircraft to Monitor Fur Seal Populations Without Disturbance	Y
Moreland et al. (2015)	61.8476	-170.529	Marine mammal	Spotted Seal, Ribbon Seal	Behavioral study	JOURNAL OF UNMANNED VEHICLE SYSTEMS	Evaluation of a ship-based unoccupied aircraft system (UAS) for surveys of spotted and ribbon seals in the Bering Sea pack ice	N	animal	taxa/species
Mulero‐Pázmány et al. (2015)	37	-6.5	Terrestrial mammal	Cattle	Individual detection and population survey	ECOLOGY AND EVOLUTION	Unmanned Aircraft Systems complement biologging in spatial ecology studies	Y
Muller et al. (2019)	-50.4958	166.296	Bird	Yellow-eyed penguin	Individual detection and population survey	WILDLIFE RESEARCH	Aerial VHF tracking of wildlife using an unmanned aerial vehicle (UAV): comparing efficiency of yellow-eyed penguin (Megadyptes antipodes) nest location methods	Y
Old et al. (2019)	-33.2525	150.176	Terrestrial mammal	Bare-nosed wombat	Individual detection and population survey	BMC ECOLOGY	Mapping out bare-nosed wombat (Vombatus ursinus) burrows with the use of a drone	Y
Oosthuizen et al. (2020)	-62.2894	-59.2272	Bird	Antarctic Shag	Individual detection and population survey	POLAR BIOLOGY	Unmanned aerial vehicle (UAV) survey of the Antarctic shag (Leucocarbo bransfieldensis) breeding colony at Harmony Point, Nelson Island, South Shetland Islands	Y
Pirotta et al. (2017)	-34.0821	151.245	Marine mammal	Humpback whale	Individual detection and population survey	FRONTIERS IN MARINE SCIENCE	An Economical Custom-Built Drone for Assessing Whale Health	Y
Pomeroy et al. (2015)	57.9331	-4.04498	Marine mammal	Gray Seal, Harbor Seal	Behavioral study	JOURNAL OF UNMANNED VEHICLE SYSTEMS	Assessing use of and reaction to unmanned aerial systems in gray and harbor seals during breeding and molt in the UK	Y
Puttock et al. (2015)			Terrestrial mammal	Eurasian beaver	Behavioral study	JOURNAL OF UNMANNED VEHICLE SYSTEMS	Aerial photography collected with a multirotor drone reveals impact of Eurasian beaver reintroduction on ecosystem structure	N	animal	taxa/species
Ramos et al. (2018)	17.2764	-87.8807	Marine mammal	Bottlenose dolphin, Antillean manatee	Behavioral study	FRONTIERS IN MARINE SCIENCE	Bottlenose dolphins and antillean manatees respond to small multi-rotor unmanned aerial systems	Y
Ratcliffe et al. (2015)	-51.48	-57.83	Bird	Gentoo Penguin	Individual detection and population survey	JOURNAL OF UNMANNED VEHICLE SYSTEMS	A protocol for the aerial survey of penguin colonies using UAVs	N	animal, monitoring	taxa/species, survey
Rey et al. (2017)	-23.2369	18.3906	Bird	Ostrich	Individual detection and population survey	REMOTE SENSING OF ENVIRONMENT	Detecting animals in African Savanna with UAVs and the crowds	Y
Rieucau et al. (2018)	-17.4907	-149.902	Fish	Blacktip reef shark	Behavioral study	JOURNAL OF FISH BIOLOGY	Using unmanned aerial vehicle (UAV) surveys and image analysis in the study of large surface‐associated marine species: a case study on reef sharks Carcharhinus melanopterus shoaling behaviour	N	animal	taxa/species
Rodríguez et al. (2012)	37.4754	-6.1198	Bird	Lesser kestrel	Behavioral study	PLOS ONE	The Eye in the Sky: Combined Use of Unmanned Aerial Systems and GPS Data Loggers for Ecological Research and Conservation of Small Birds	Y
Rümmler et al. (2016)	-62.2125	-58.9189	Bird	Adélie Penguin	Behavioral study	POLAR BIOLOGY	Measuring the influence of unmanned aerial vehicles on Adélie penguins	N	monitoring	behavior/disturbance
Rümmler et al. (2018)	-62.2125	-58.9189	Bird	Adélie Penguin, Gentoo Penguin	Behavioral study	POLAR BIOLOGY	Sensitivity of Adélie and Gentoo penguins to various flight activities of a micro UAV	N	monitoring	behavior/disturbance
Rush et al. (2018)	51.6986	-5.27537	Bird	Lesser Black‐backed Gulls	Individual detection and population survey	ECOLOGY AND EVOLUTION	Can drones count gulls? Minimal disturbance and semiautomated image processing with an unmanned aerial vehicle for colony-nesting seabirds	Y
Sardà-Palomera et al. (2012)	41.68	0.94	Bird	Black-headed Gull	Individual detection and population survey	IBIS	Fine-scale bird monitoring from light unmanned aircraft systems	Y
Scarpa and Piña (2019)	-28.9503	-58.8281	Reptile	Yacare caiman, Broad-snouted caiman	Individual detection and population survey	BIOLOGICAL CONSERVATION	The use of drones for conservation: A methodological tool to survey caimans nests density	Y
Schofield et al. (2017)	37.7315	20.8886	Reptile	Loggerhead sea turtle	Individual detection and population survey	FUNCTIONAL ECOLOGY	Detecting elusive aspects of wildlife ecology using drones: New insights on the mating dynamics and operational sex ratios of sea turtles	N	monitoring	survey
Schofield et al. (2017)	37.7315	20.8886	Reptile	Loggerhead sea turtle	Behavioral study	MARINE ECOLOGY PROGRESS SERIES	Aerial and underwater surveys reveal temporal variation in cleaning-station use by sea turtles at a temperate breeding area	N	monitoring	survey
Scholten et al. (2019)	42.535	-85.3017	Bird	Field sparrow	Individual detection and population survey	BIOLOGICAL CONSERVATION	Real-time thermal imagery from an unmanned aerial vehicle can locate ground nests of a grassland songbird at rates similar to traditional methods	Y
Scholten et al. (2020)	42.9592	-85.8981	Bird	Tree swallow	Behavioral study	CONSERVATION PHYSIOLOGY	Short-term exposure to unmanned aerial vehicles does not alter stress responses in breeding tree swallows	Y
Scobie and Hugenholtz (2016)	51.0764	-114.14	Terrestrial mammal, Bird	White‐tailed deer, Domestic dog, Domestic cat, Northern bobwhite, Mallard	Behavioral study	WILDLIFE SOCIETY BULLETIN	Wildlife Monitoring With Unmanned Aerial Vehicles: Quantifying Distance to Auditory Detection	Y
Seymour et al. (2017)	46.0226	-59.6853	Marine mammal	Grey Seal	Individual detection and population survey	SCIENTIFIC REPORTS	Automated detection and enumeration of marine wildlife using unmanned aircraft systems (UAS) and thermal imagery	N	monitoring	survey
Sorrell et al. (2019)	-38.5	145.167	Marine mammal	Australian fur seal	Individual detection and population survey	ECOSPHERE	Remotely piloted aircraft improve precision of capture-mark-resight population estimates of Australian fur seals	Y
Stark et al. (2018)	5.50594	118.292	Terrestrial mammal	Proboscis monkey	Behavioral study	REMOTE SENSING IN ECOLOGY AND CONSERVATION	Combining drones and satellite tracking as an effective tool for informing policy change in riparian habitats: a proboscis monkey case study	Y
Su et al. (2018)	37.1917	90.475	Terrestrial mammal	Wild Yak	Individual detection and population survey	INTERNATIONAL JOURNAL OF REMOTE SENSING	Using an unmanned aerial vehicle (UAV) to study wild yak in the highest desert in the world	Y
Sweeney et al. (2016)	51.884	177.222	Marine mammal	Steller Sea Lion	Individual detection and population survey	JOURNAL OF UNMANNED VEHICLE SYSTEMS	Flying beneath the clouds at the edge of the world: using a hexacopter to supplement abundance surveys of Steller sea lions (Eumetopias jubatus) in Alaska	N	animal, monitoring	taxa/species, survey
Sykora-Bodie et al. (2017)	10.0007	-85.7162	Reptile	Olive ridley sea turtle	Individual detection and population survey	SCIENTIFIC REPORTS	Quantifying Nearshore Sea Turtle Densities: Applications of Unmanned Aerial Systems for Population Assessments	N	animal	taxa/species
Thapa et al. (2018)	28.4379	81.4043	Reptile	Gharial, Mugger	Individual detection and population survey	JOURNAL OF UNMANNED VEHICLE SYSTEMS	Counting crocodiles from the sky: monitoring the critically endangered gharial (Gavialis gangeticus) population with an unmanned aerial vehicle (UAV)	Y
Torres et al. (2018)	44.6076	-124.082	Marine mammal	Gray whale	Behavioral study	FRONTIERS IN MARINE SCIENCE	Drone Up! Quantifying Whale Behavior From a New Perspective Improves Observational Capacity	N	monitoring	behavior/disturbance
Tremblay et al. (2017)	47.3885	-71.0828	Bird	Bicknell’s thrush, Swainson’s thrush	Individual detection and population survey	JOURNAL OF UNMANNED VEHICLE SYSTEMS	A low-cost technique for radio-tracking wildlife using a small standard unmanned aerial vehicle	Y
van Andel et al. (2015)	-2.06667	9.05	Terrestrial mammal	Chimpanzee	Individual detection and population survey	AMERICAN JOURNAL OF PRIMATOLOGY	Locating Chimpanzee Nests and Identifying Fruiting Trees With an Unmanned Aerial Vehicle	Y
Vas et al. (2015)	43.605	4.055	Bird	Mallard, Common Greenshank, Flamingo	Behavioral study	BIOLOGY LETTERS	Approaching birds with drones: first experiments and ethical guidelines	Y
Vermeulen et al. (2013)	11.1314	-1.56694	Terrestrial mammal	African Elephant	Individual detection and population survey	PLOS ONE	Unmanned Aerial Survey of Elephants	Y
Watts et al. (2010)			Reptile	American Alligator	Individual detection and population survey	JOURNAL OF WILDLIFE MANAGEMENT	Small Unmanned Aircraft Systems for Low-Altitude Aerial Surveys	Y
Weimerskirch et al. (2018)	-46.4333	51.6904	Bird	King Penguin, Macaroni Penguin, Southern Rock-hopper Penguin, Gentoo Penguin, Wnadering Albatross, Sotty Albatross, Light-mantles Sooty Albatross, Southern giant Petrel, Norther Giant Petrel, Imperial Cormorant, Sub-Antarctic Skua	Behavioral study	POLAR BIOLOGY	Flights of drones over sub-Antarctic seabirds show species- and status-specific behavioural and physiological responses	Y
Weissensteiner et al. (2015)	59.8559	17.6475	Bird	Hooded Crow	Individual detection and population survey	JOURNAL OF AVIAN BIOLOGY	Low‐budget ready‐to‐fly unmanned aerial vehicles: an effective tool for evaluating the nesting status of canopy‐breeding bird species	N	animal, monitoring	taxa/species, survey
Wich et al. (2015)	4.11963	98.0588	Terrestrial mammal	Sumatran orang-utan	Individual detection and population survey	JOURNAL OF UNMANNED VEHICLE SYSTEMS	A preliminary assessment of using conservation drones for Sumatran orang-utan (Pongo abelii) distribution and density	Y
Williams et al. (2020)			Terrestrial mammal	Mule deer	Individual detection and population survey	JOURNAL OF AGRICULTURAL BIOLOGICAL AND ENVIRONMENTAL STATISTICS	Estimating Reproduction and Survival of Unmarked Juveniles Using Aerial Images and Marked Adults	Y
Wilson et al. (2017)	39.9347	-77.1778	Bird	Wood Thrush, Eastern Towhee, Shipping Sparrow, Song Sparrow, Eastern Meadowlark	Individual detection and population survey	THE AUK	The feasibility of counting songbirds using unmanned aerial vehicles	N	animal	taxa/species
Witczuk et al. (2018)	53.141	15.8452	Terrestrial mammal	Red deer, Wild boar, Roe deer	Individual detection and population survey	INTERNATIONAL JOURNAL OF REMOTE SENSING	Exploring the feasibility of unmanned aerial vehicles and thermal imaging for ungulate surveys in forests - preliminary results	Y
